# Supplementary material
Source: PubMed Central journal article supplement (PMC6511450)
Supplement: NIHMS1021769-supplement-Supplemental_Figures_1-23.pdf [file NIHMS1021769-supplement-Supplemental_Figures_1-23.pdf]

Figure 1

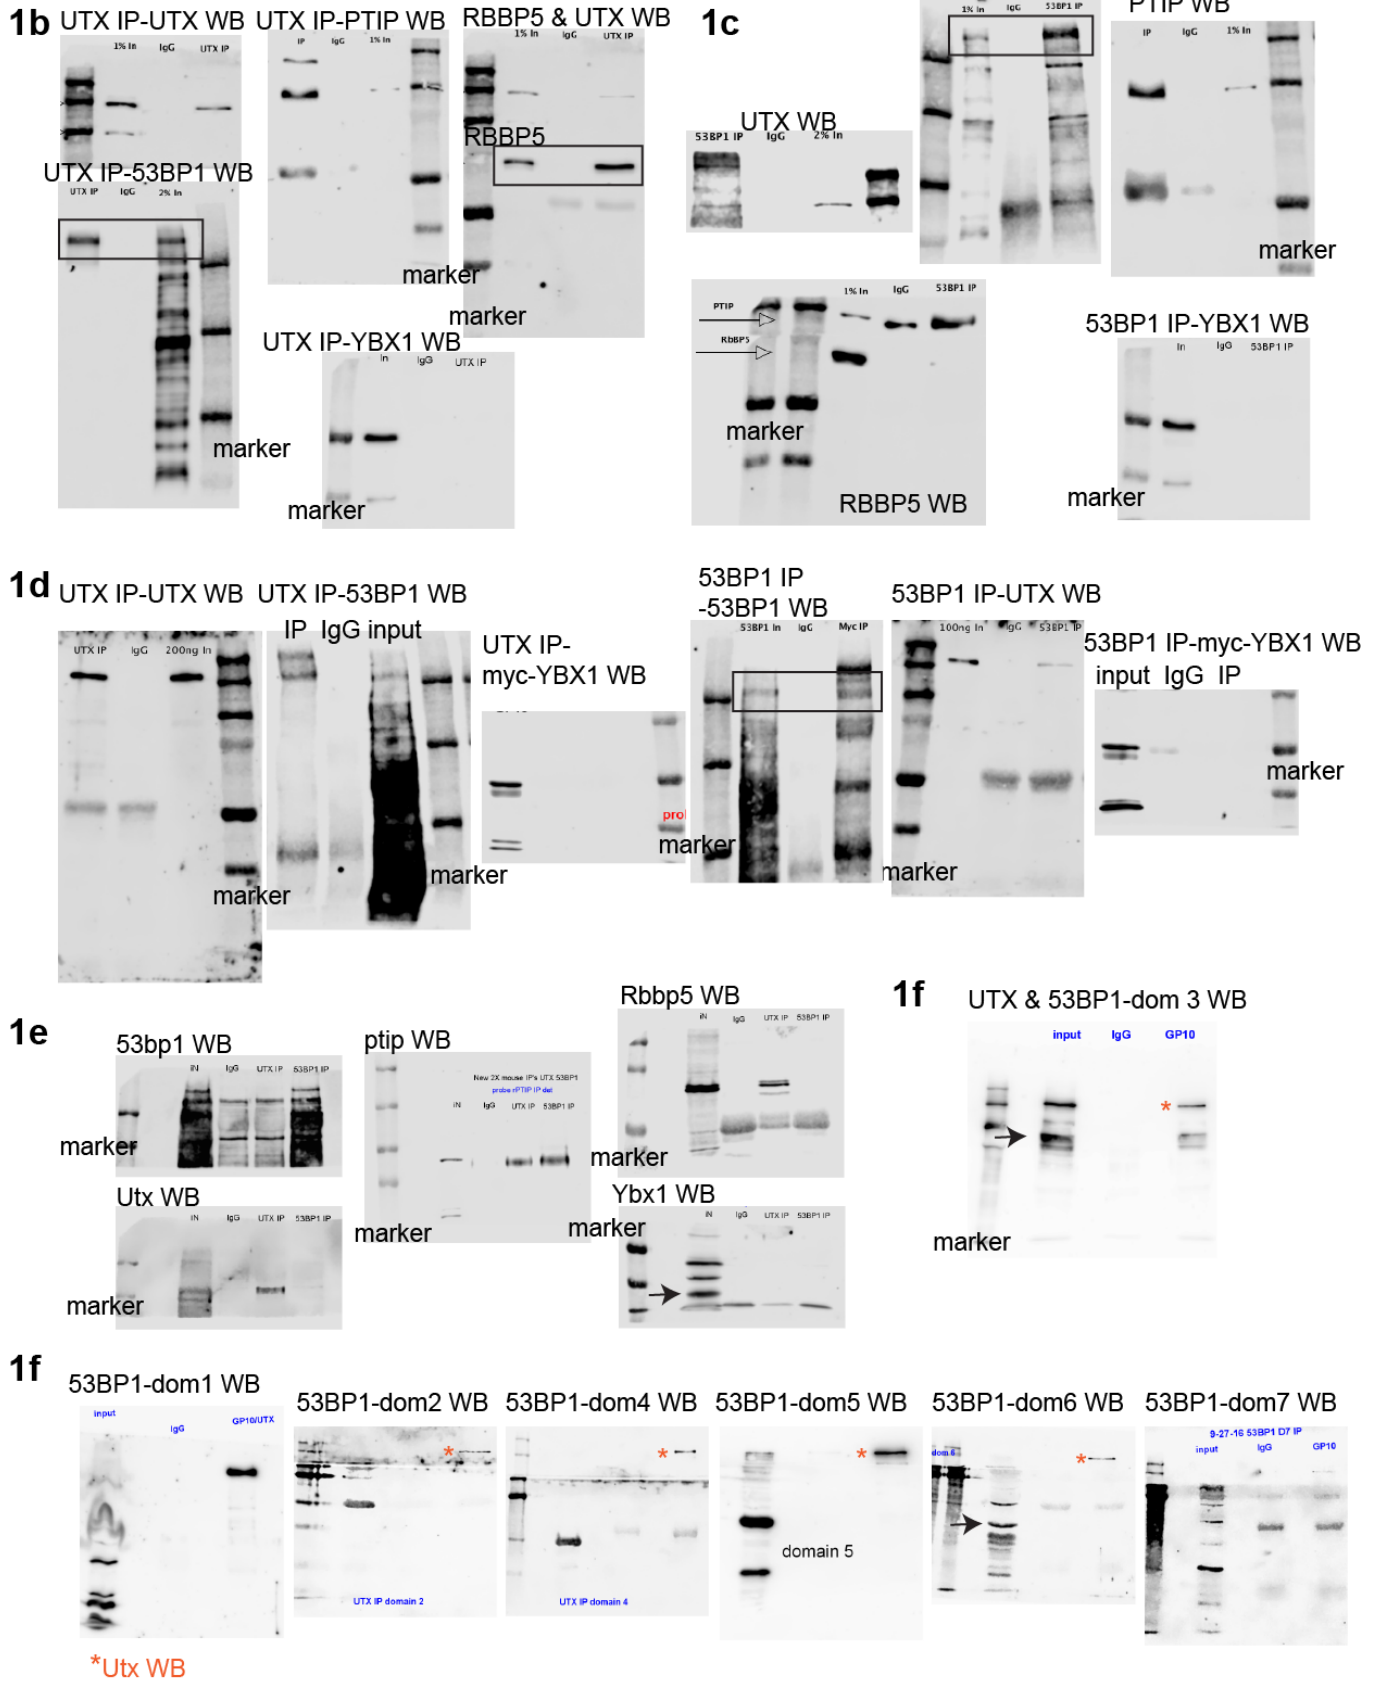

Figure 1 (cont'd)

Supp. Fig 2

**1h** h or m dom3 pull  
myc-dom3 WB

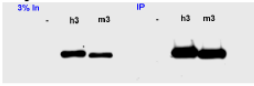

h or m dom3 pull  
UTX WB

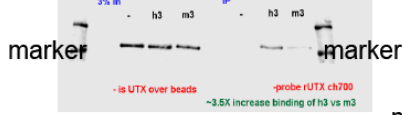

**1i** h or m dom3iii pull  
myc-dom3iii WB

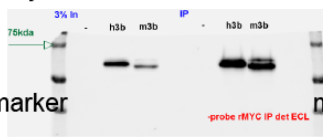

h or m dom3iii pull  
UTX WB

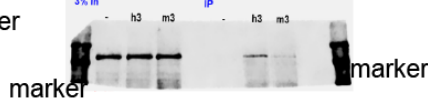

**S2b** UTX WB

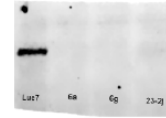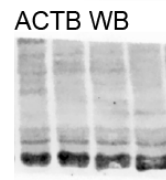

**S2e** 53BP1-dom3 IP  
53BP1-dom3 WB

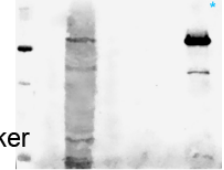

53BP1-dom3 IP  
UTX WB

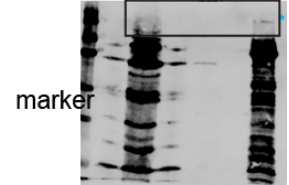

**S2f** 53BP1-dom3i pull  
53BP1-dom3i WB

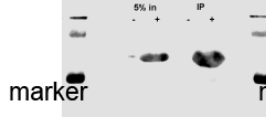

53BP1-dom3i pull  
UTX WB

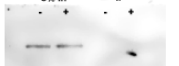

53BP1-dom3ii & 3iii pull  
dom WB

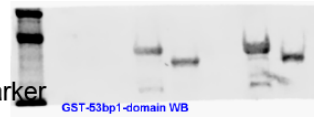

53BP1-dom3ii & 3iii pull  
UTX WB

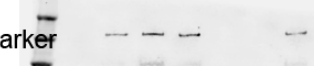

**3b**

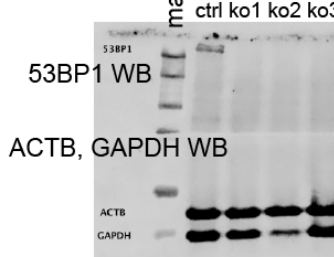

UTX WB

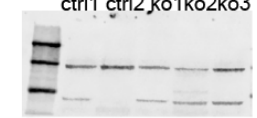

**5b** UTX WB

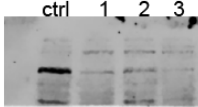

TUB, ACTB, GAPDH WB

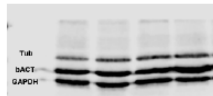

**6b** 53BP1 mut1

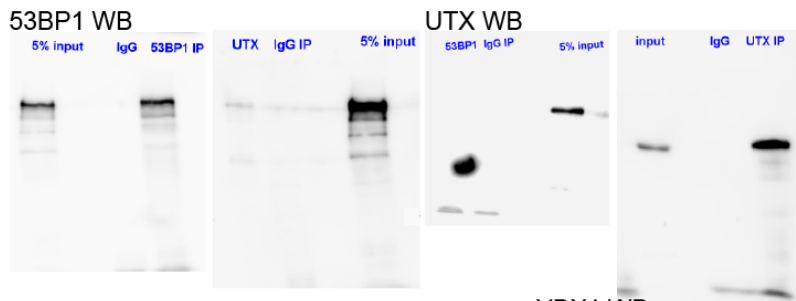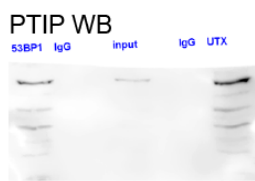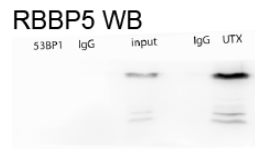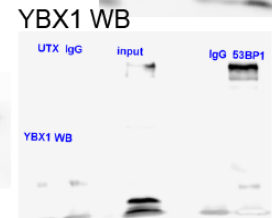

**6b**

53BP1 mut2

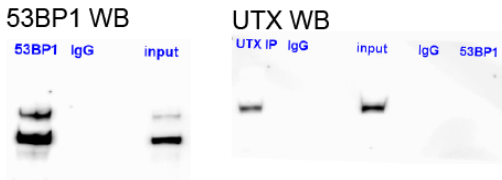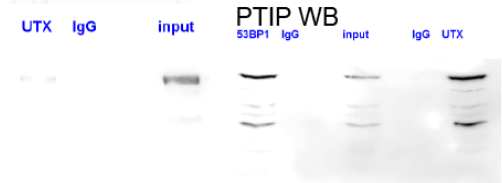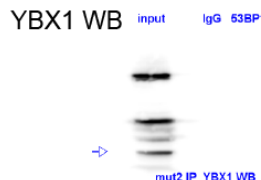

### 6b control

#### UTX WB

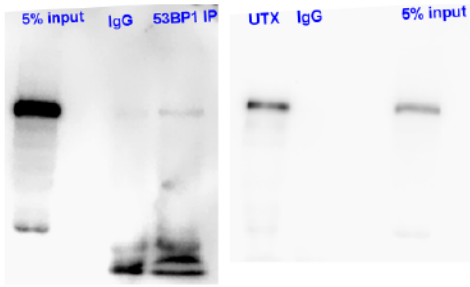

#### 53BP1 WB

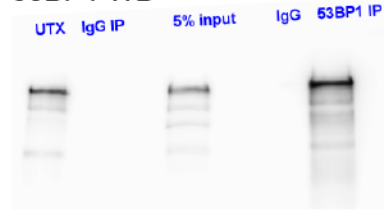

#### PTIP WB

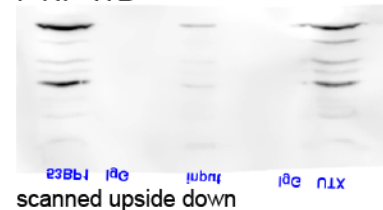

scanned upside down

#### RBBP5 WB

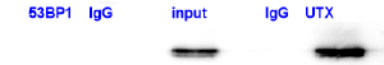

#### YBX1 WB

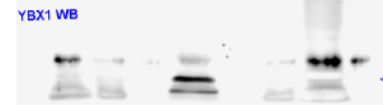

### S16a

#### m53bp1 WB

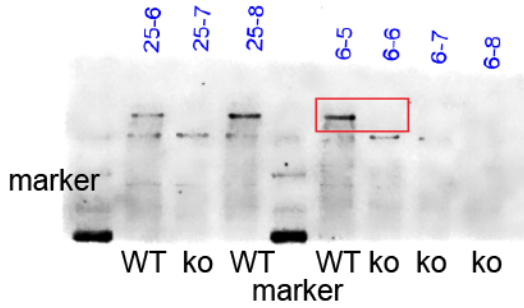

#### actb WB

#### gapdh WB

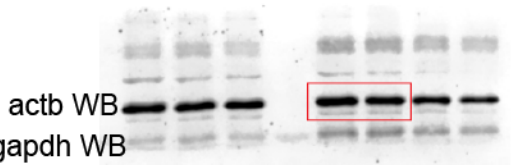

### S17b 53bp1 mut

#### mUtx WB

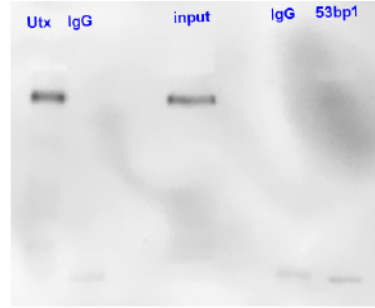

#### m53bp1 WB

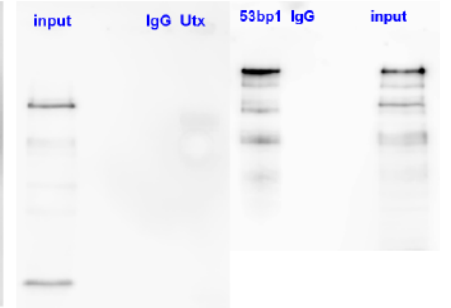

#### mYbx1 WB

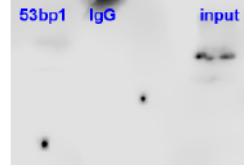

#### utx IgG

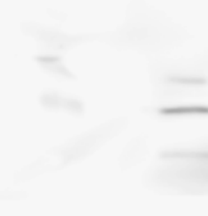

### S17b control

#### mUtx WB

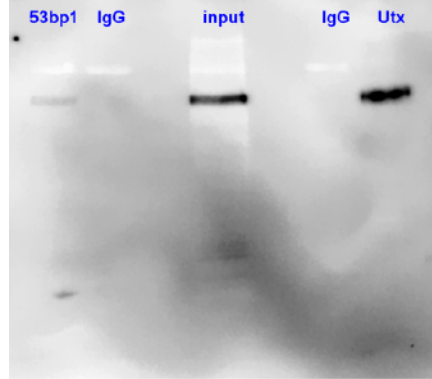

#### m53bp1 WB

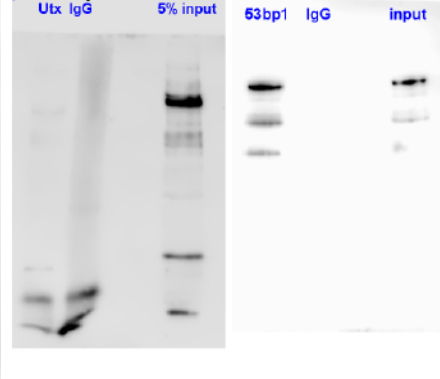

#### mYbx1 WB

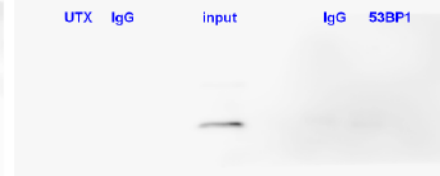

Supplementary Figure 1

Full scan of all western blots in this paper.

No caption.



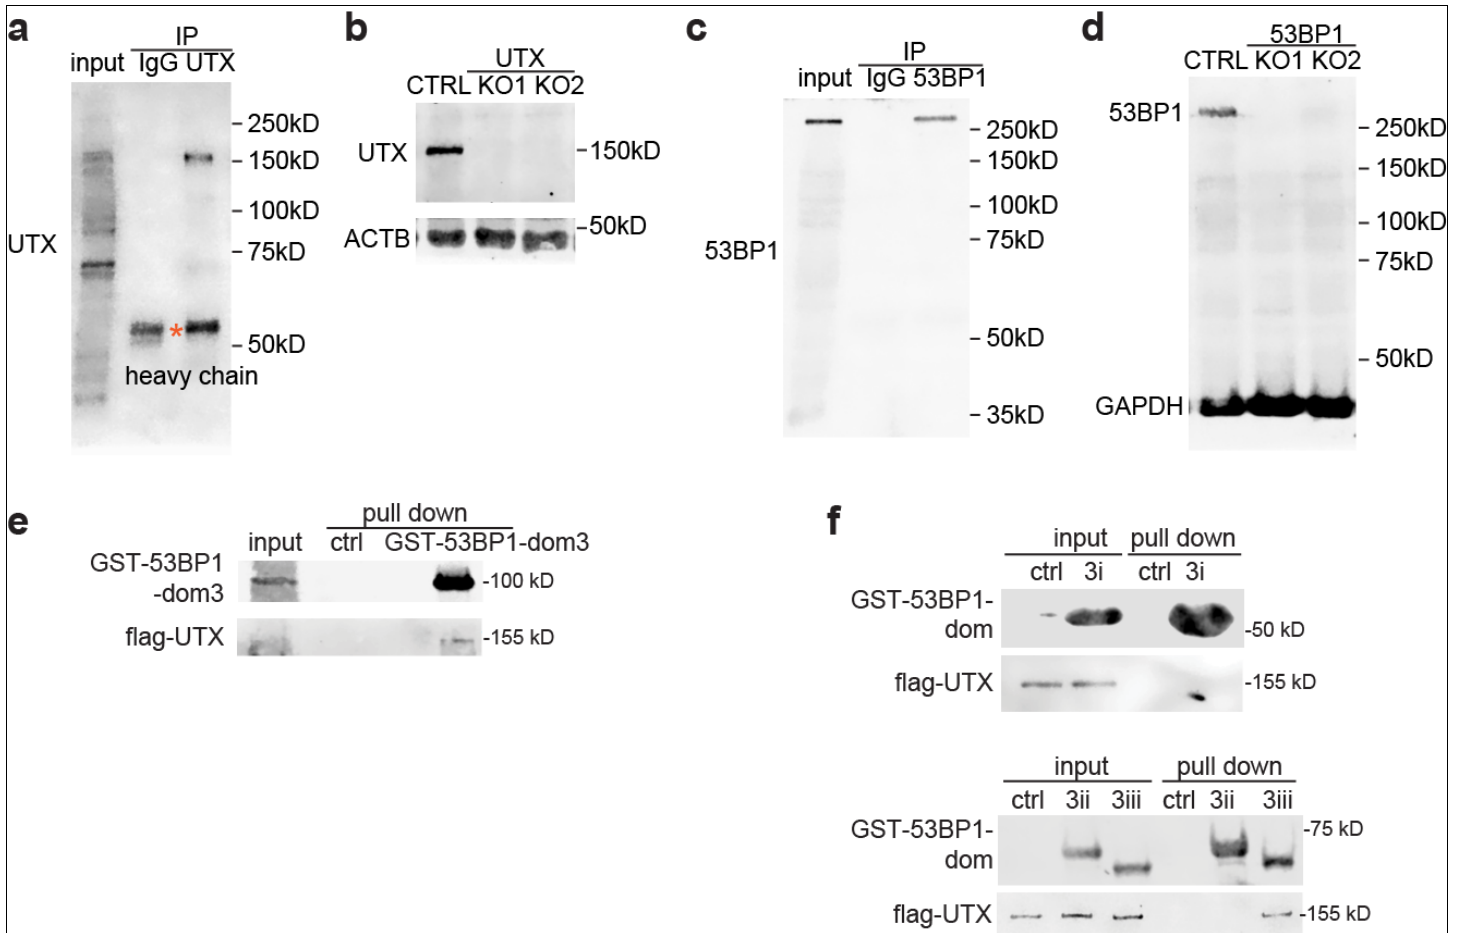

### Supplementary Figure 2

WB analysis of immunoprecipitation and pull down.

WB analysis of (A) IgG and UTX IP; (B) control and UTX-KO nuclear extract; (C) IgG and 53BP1 IP; (D) control and 53BP1-KO nuclear extract; (E) glutathione IP of control and GST-tagged human 53BP1-domain 3; and (F) glutathione IP of control and GST-human 53BP1 domains 3i, 3ii, and 3iii with full-length flag-UTX. Experiments were repeated 2 times for a-d and 3 times for e-f to yield similar results. WB images are cropped.

Pairwise comparison of 53BP1 ChIP-seq datasets

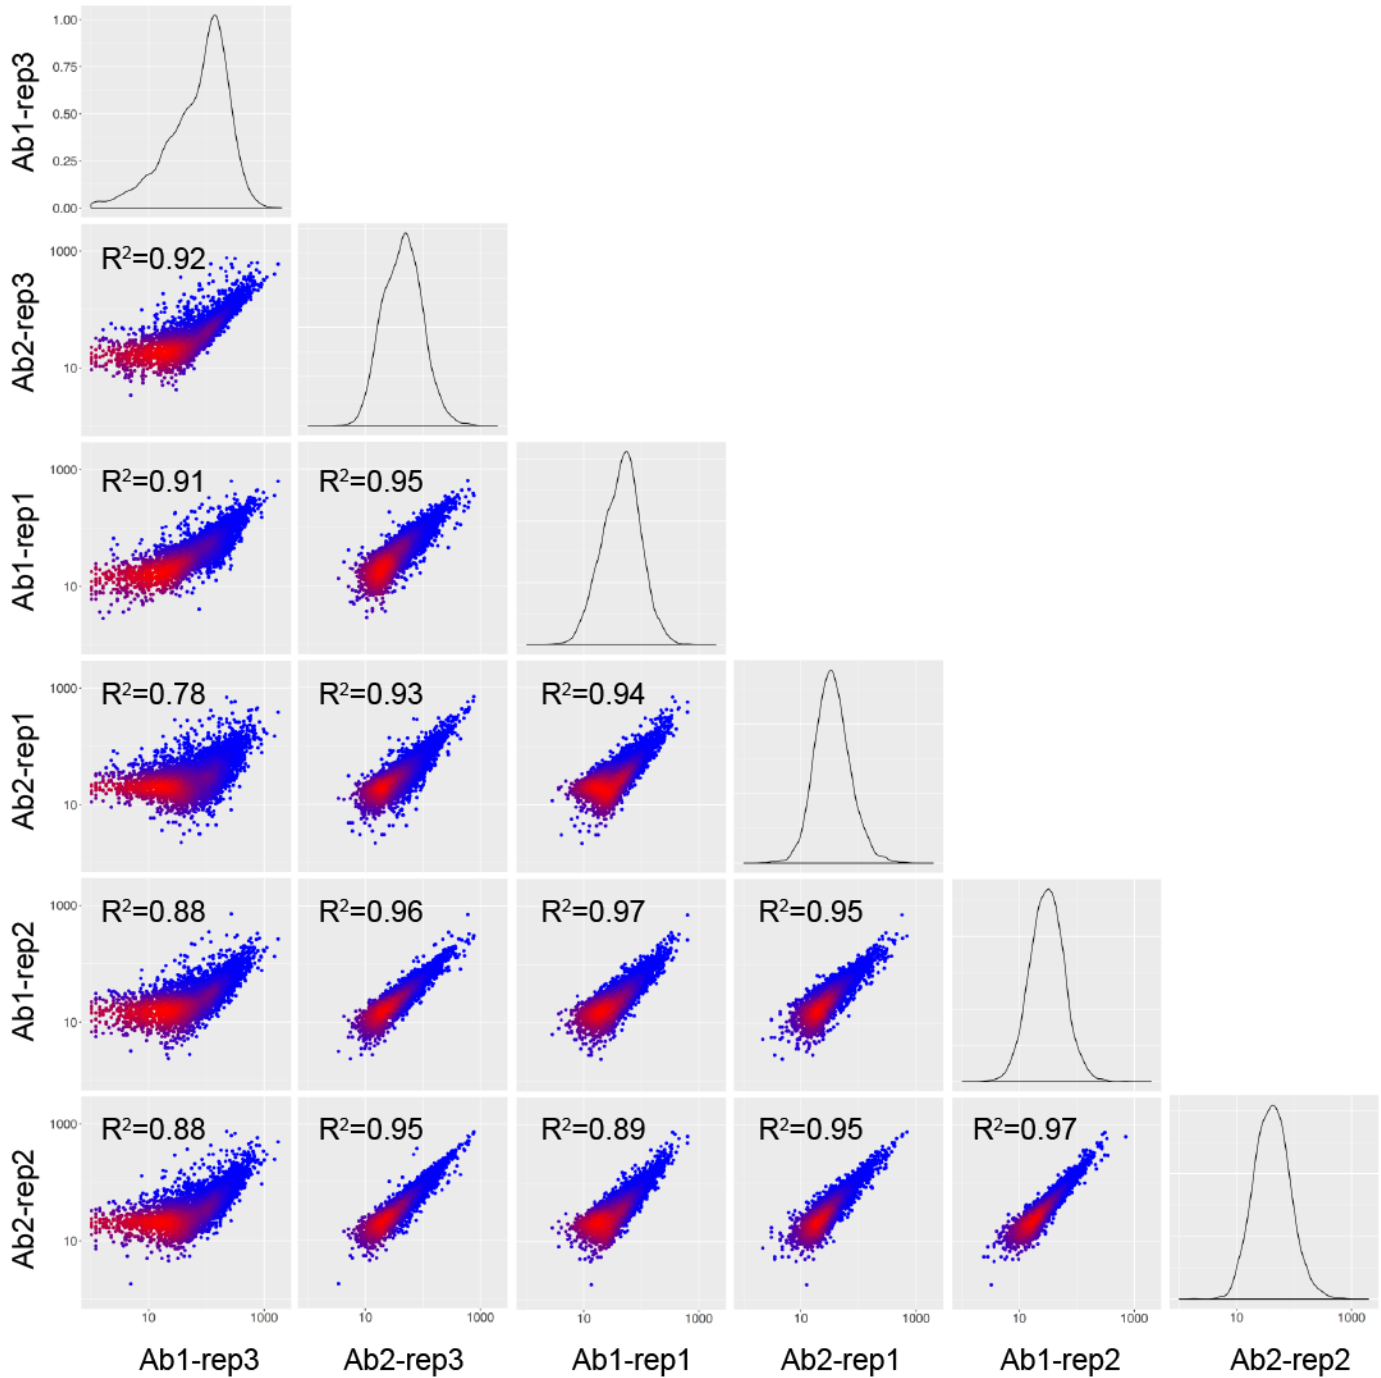

Supplementary Figure 3

High correlation between the 6 biological replicate datasets of 53BP1 ChIP-seq from 2 antibodies.

Each dataset is ChIP-seq signals at binned genomic regions. Pairwise counts per million of the datasets, with respective  $R^2$  values are Pearson correlation coefficients. Red indicates a higher density of points. Diagonal curve plots show the kernel density of ChIP-seq reads in each dataset.

### Pairwise comparison of UTX ChIP-seq datasets

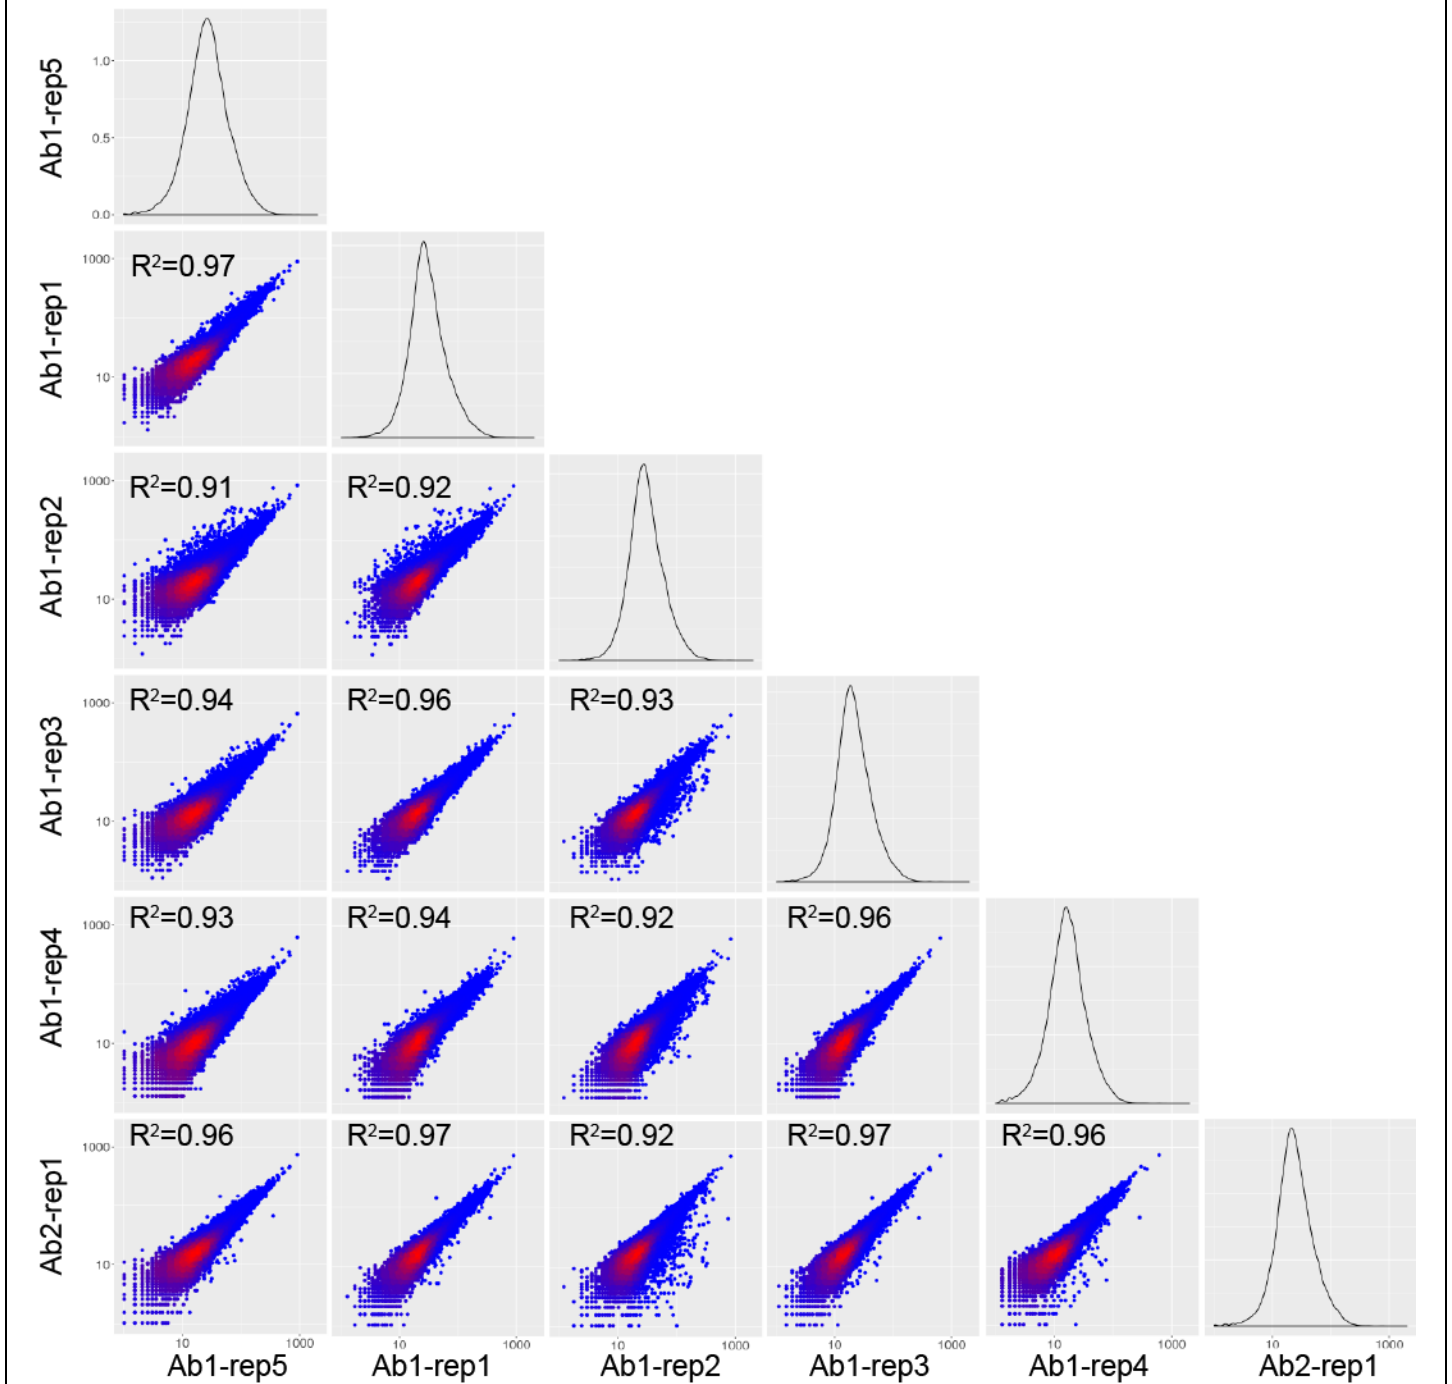

**Supplementary Figure 4**

**High correlation between the six biological replicate datasets of UTX ChIP-seq from two antibodies.**

Each dataset is ChIP-seq signals at binned genomic regions. Pair-wise counts per million of the datasets with respective  $R^2$  values are Pearson correlation coefficients. Red indicated higher density of points. Diagonal curve plots show the kernel density of ChIP-seq reads in each dataset.

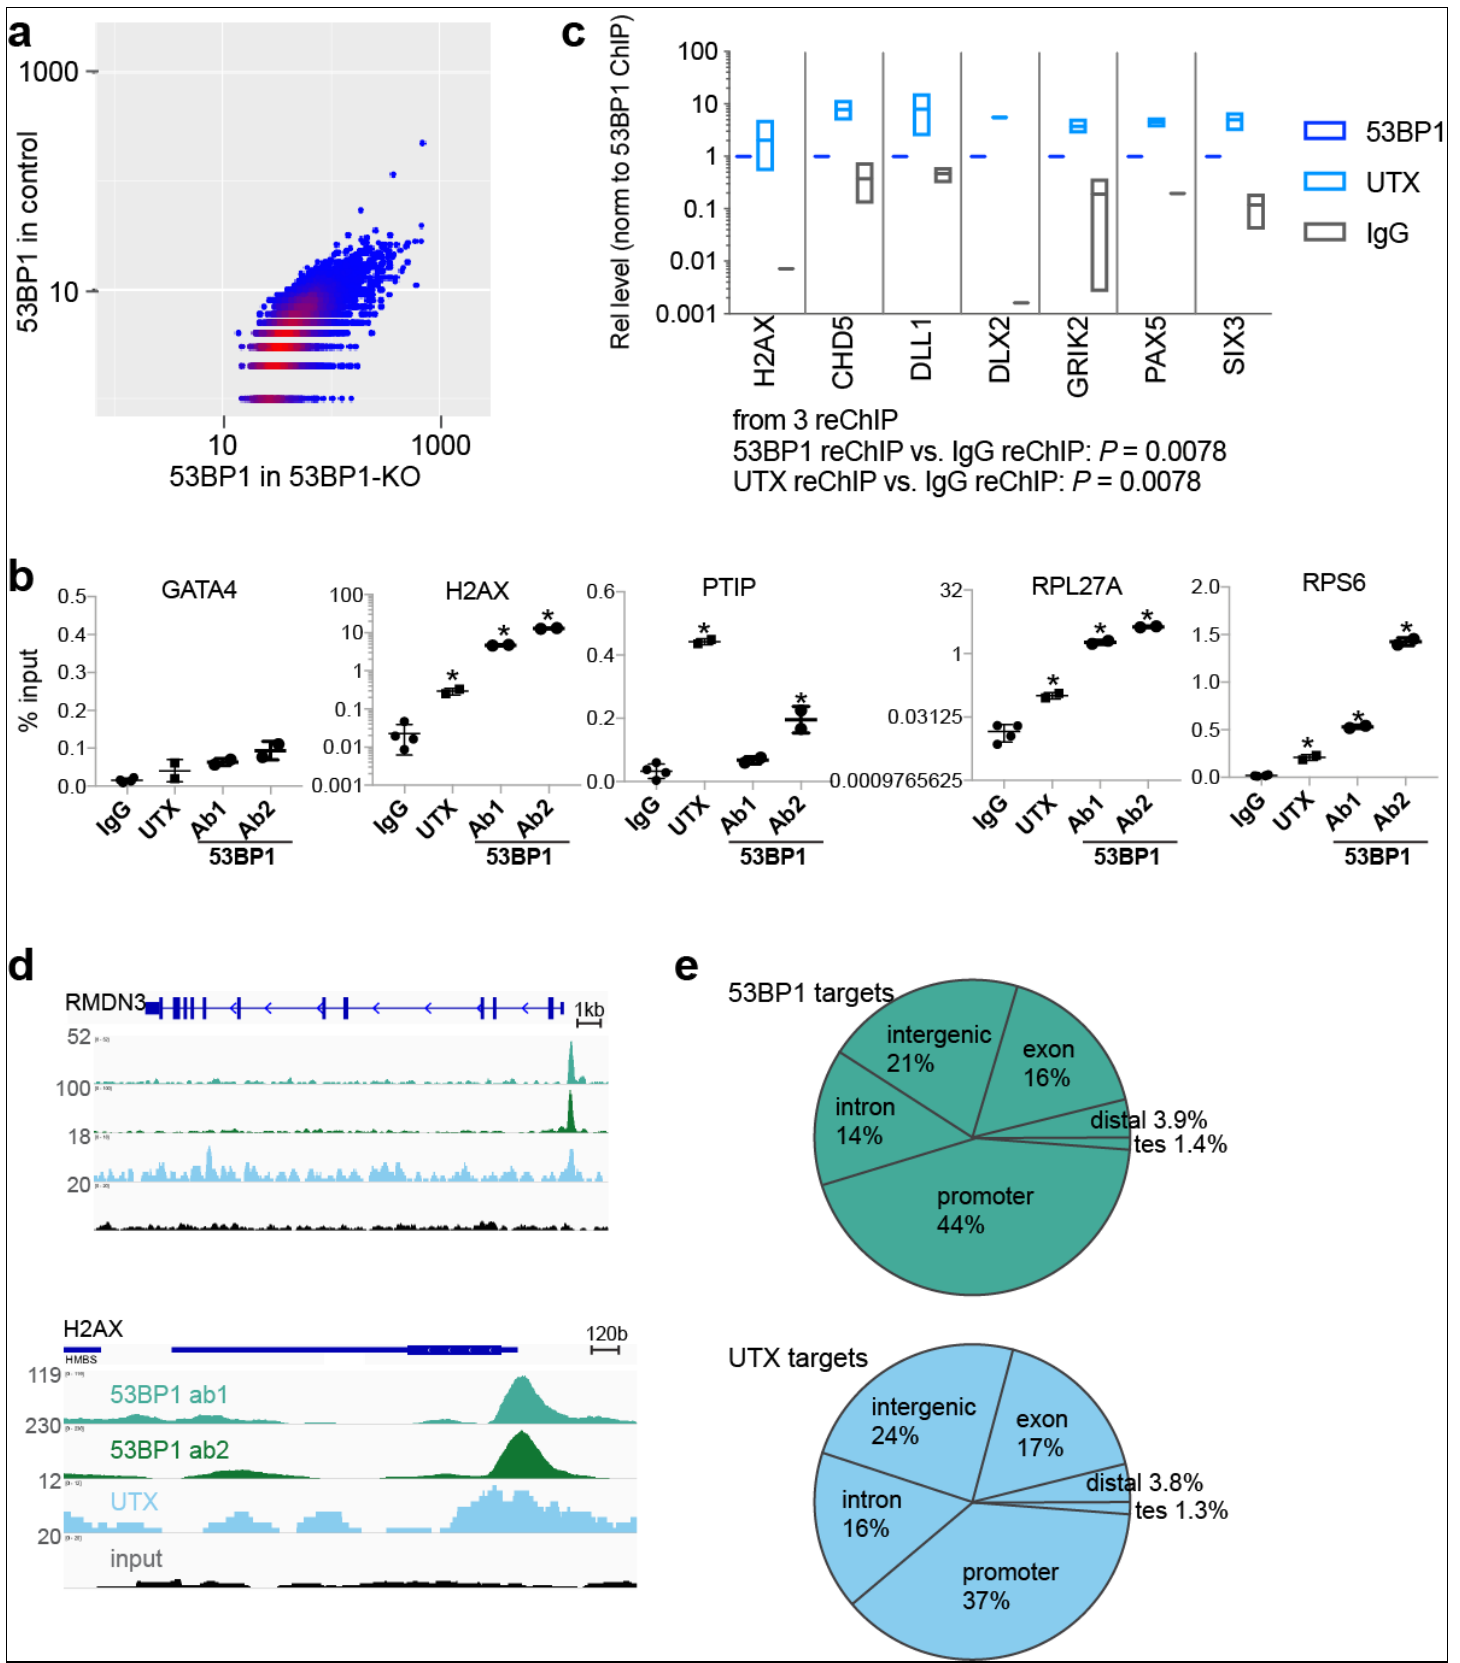

Supplementary Figure 5

### **UTX and 53BP1 bindings are enriched at transcription start sites.**

(a) Low correlation between 53BP1 ChIP-seq in control and 53BP1-KO cells. Correlated was analyzed by using linear model of Goodness-of-Fit package in R. Each dataset contains ChIP-seq signals at binned genomic regions. The graph displays pairwise counts per million of the datasets, with Red indicating a higher density of points. 1 sample each was used in the analysis. (b) Validation of ChIP-seq targets of UTX and 53BP1 by ChIP-qPCR. The relative enrichment of H2AX, PTIP, RPL27A, and RPS6 promoters was quantified via IgG, UTX, and 53BP1 ChIP. The GATA4 promoter was the negative control. N=3 technical qPCR values; 2 biological repeats yielded similar results. Center values and error bars are mean and standard deviation. \* indicates  $P < 0.001$  by one-sided Student's  $t$  test. (c) Summary data from 3 independent re-ChIP-qPCR experiments. For each experiment, the relative levels of UTX and IgG ChIP were normalized to 53BP1 re-ChIP. 53BP1 and UTX ChIP are significantly higher than IgG ChIP, using one-sided paired  $t$  test. N=3. Center values and error bars are mean and standard deviation. (d) Representative 53BP1 and UTX ChIP-seq tracks peak at the transcription start site of the RMDN3 or H2AX locus. The input DNA track is displayed for comparison. Experiments were repeated 6 times to yield similar results. (e) Pie charts indicate the proportions of UTX or 53BP1 binding site enrichment. 'Distal' indicates regions that are 5 kb from transcription start sites. 'Tes' denotes transcription termination sites.

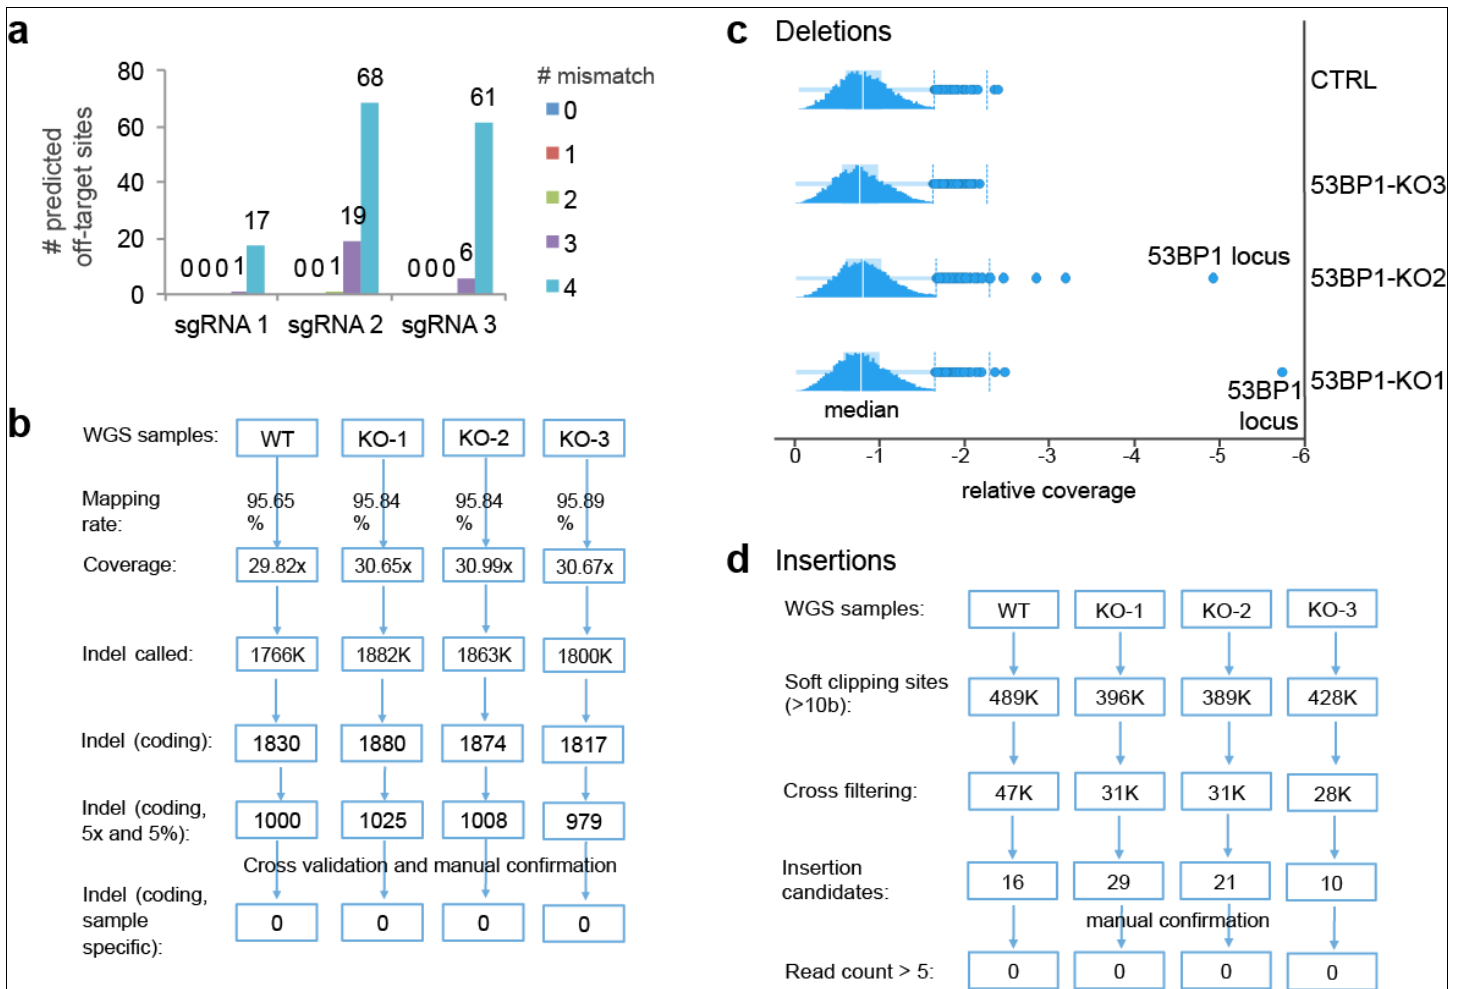

**Supplementary Figure 6**

**Whole-genome sequencing analyses.**

(a) Numbers of predicted off-target sites with 0-4 mismatches to each of three CRISPR gRNAs used in the study. (b) Summary flow chart of sequencing analysis to detect small insertions and deletions (indel). Against the human reference genome (hg19), detected indels were filtered by the listed criteria, removed while present in more than one sample or sample group, and manually confirmed excluding sequencing or mapping errors. A 7-bp deletion in KO-3, specific to the 53BP1-KO line, was the only functionally related indel detected through the workflow. (c) Deletion analysis. The relative coverage analysis among this group of samples, targeting for deletions larger than 50 bp, was performed to only identify two deletions within the 53BP1 locus of the 53BP1-KO cells. (d) Summary flow chart of insertion analysis. The soft-clipped reads (>10 bp overhang) were extracted and used to detect larger insertions that were failed to report in previous indel analysis. Soft-clipping break points were summarized as genomic locations, cross filtering between samples was to remove non-specific locations, and the potential insertion sites were defined as a pair of bi-direction break points within a 5-bp window. After removing the low coverage noise, the insertion event in KO-3, specific to the 53BP1-KO lines, was the only insertion reported through the workflow.

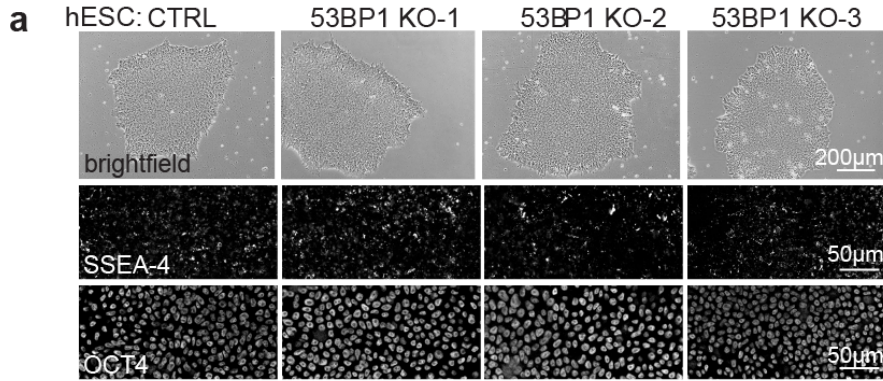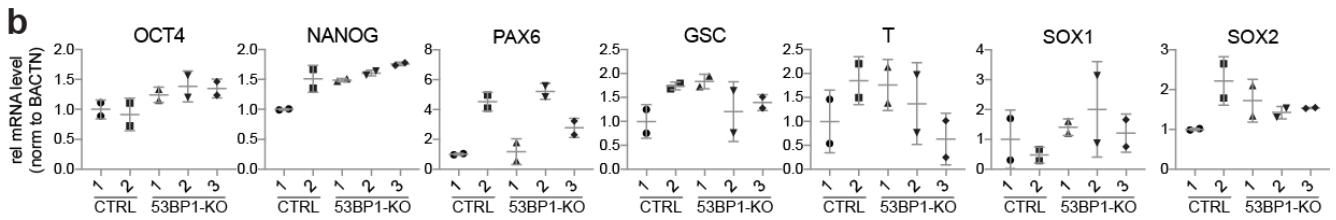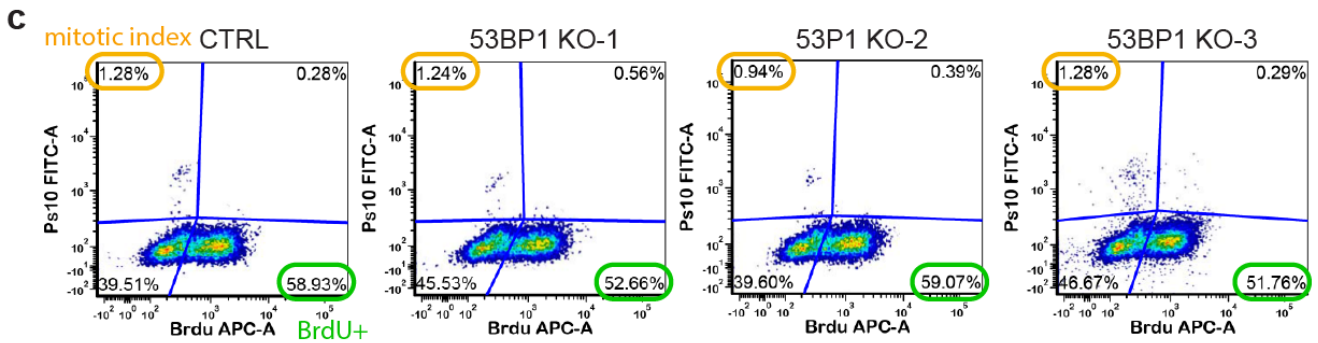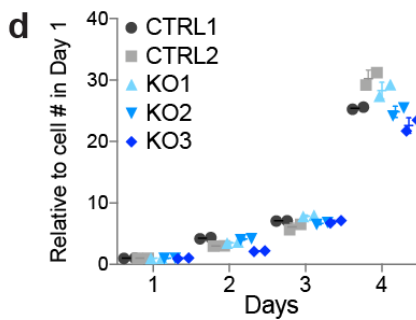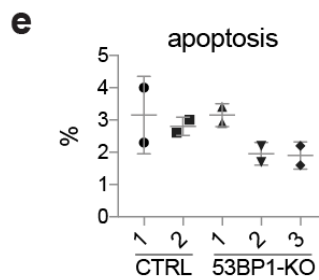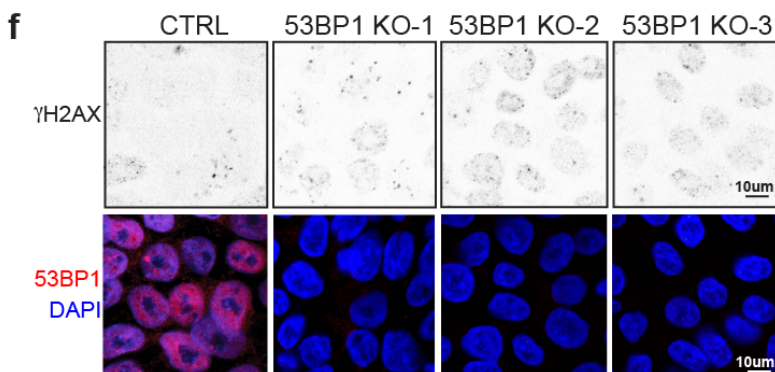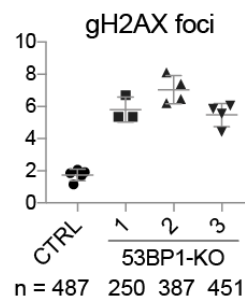

## Supplementary Figure 7

### 53BP1 does not affect pluripotency, apoptosis, or proliferation of hESCs.

(a) Bright field imaging (Top), SSEA-4 immunofluorescence (IF) (Middle), and OCT4 IF (Bottom) of control cells and 53BP1 KO clones 1-3. (b) Quantification of relative expression of pluripotency markers or germ layer markers in 2 control and 3 53BP1-KO clones. Marker cDNA was quantified by performing RT-qPCR, with circles and bars indicating mean and standard deviation values, respectively. Control and 53BP1-KO cells did not differ significantly by the Student's *t* test. N=3 technical RT samples. Center values and error bars are mean and standard deviation. No statistical significance by one-sided *t* test. (c) The proportion of mitotic or BrdU-positive cells in control and 3 53BP1-KO clones was quantified by performing FACS of phosphorylated-serine 10 in histone H3 and BrdU labeling. (d) Relative cell numbers of 2 control and 3 53BP1-KO clones proliferating over 4 days. N=2 biological samples for each group. No significant difference by the chi-squared test. (e) The proportion of apoptotic cells in 2 control and 3 53BP1-KO clones. Apoptosis was quantified via annexin V and propidium iodide FACS. N=2 biological samples for each group. No significant difference by the chi-squared test. (f)  $\gamma$ H2AX and 53BP1 IF analysis of control cells and 53BP1 KO clones 1-3. For ease of visualization, the high intensity of the  $\gamma$ H2AX IF signal is black. Bars, 10  $\mu$ m. N=487, 250, 387, and 451 cells. Graph at right summarizes foci quantification, with center values and error bars being mean and standard deviation, and \*\*\*\*  $P < 0.0001$  by the ANOVA test.



**a**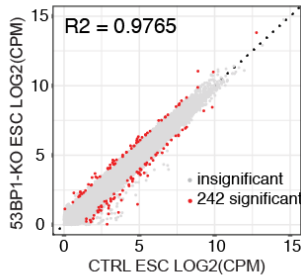**c**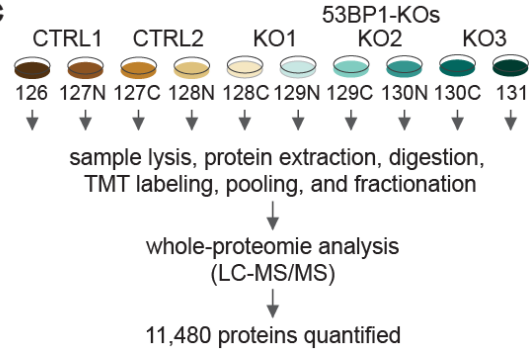**b**

| 53BP1-bound genes, 675 downregulated in 53BP1 KO hESC                     | # Genes | P value  | Statistical significance<br>-log <sub>10</sub> (P value) |
|---------------------------------------------------------------------------|---------|----------|----------------------------------------------------------|
| positive regulation of transcription from RNA polymerase II promoter      | 83      | 3.32E-13 | 13                                                       |
| cell-cell adhesion                                                        | 36      | 4.05E-11 | 11                                                       |
| transcription, DNA-templated                                              | 114     | 9.88E-08 | 8                                                        |
| regulation of mRNA stability                                              | 17      | 6.95E-07 | 7                                                        |
| negative regulation of transcription from RNA polymerase II promoter      | 51      | 5.06E-06 | 6                                                        |
| actin cytoskeleton organization                                           | 16      | 6.07E-05 | 5                                                        |
| negative regulation of epidermal growth factor receptor signaling pathway | 8       | 2.38E-04 | 4                                                        |
| protein polyubiquitination                                                | 18      | 3.19E-04 | 4                                                        |
| Wnt signaling pathway                                                     | 18      | 3.85E-04 | 4                                                        |

| 53BP1-bound genes, 886 upregulated in 53BP1 KO hESC         | # Genes | P value  | Statistical significance<br>-log <sub>10</sub> (P value) |
|-------------------------------------------------------------|---------|----------|----------------------------------------------------------|
| ER-associated ubiquitin-dependent protein catabolic process | 17      | 3.52E-09 | 9                                                        |
| protein N-linked glycosylation                              | 13      | 5.60E-08 | 8                                                        |
| membrane protein ectodomain proteolysis                     | 9       | 2.31E-06 | 6                                                        |
| Notch receptor processing                                   | 8       | 2.33E-06 | 6                                                        |
| protein folding in endoplasmic reticulum                    | 7       | 8.80E-06 | 6                                                        |
| dolichol-linked oligosaccharide biosynthetic process        | 7       | 2.38E-05 | 5                                                        |
| IRE1-mediated unfolded protein response                     | 12      | 4.09E-05 | 5                                                        |

**d**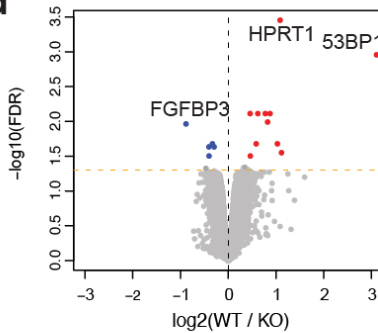**e**

| name                             | full name                                                  | protein accession #            | peptide spectral match | KO / WT ratio |
|----------------------------------|------------------------------------------------------------|--------------------------------|------------------------|---------------|
| <b>Downregulated in 53BP1-KO</b> |                                                            |                                |                        |               |
| TP53BP1                          | Tumor suppressor p53-binding protein 1                     | sp Q12888 TP53B_HUMAN          | 115                    | 0.09          |
| SP140L                           | Nuclear body protein SP140-like protein                    | sp Q9H930 SP14L_HUMAN          | 1                      | 0.37          |
| MT1G                             | Metallothionein-1G                                         | sp P13640 MT1G_HUMAN           | 10                     | 0.39          |
| S100A13                          | Protein S100-A13                                           | sp Q99584 S10AD_HUMAN          | 14                     | 0.40          |
| GSDMD                            | Gasdermin-D                                                | sp P57764 GSDMD_HUMAN          | 9                      | 0.44          |
| CAMK2A                           | Calcium/calmodulin-dependent kinase type II alpha          | tr D6RFJ0 D6RFJ0_HUMAN         | 1                      | 0.45          |
| CCDC152                          | Coiled-coil domain-containing protein 152                  | sp Q4G0S7 CC152_HUMAN          | 5                      | 0.45          |
| HPRT1                            | Hypoxanthine-guanine phosphoribosyltransferase             | sp P00492 HPRT_HUMAN           | 77                     | 0.45          |
| FOSL1                            | Fos-related antigen 1                                      | sp P15407 FOSL1_HUMAN          | 1                      | 0.46          |
| ZNF212                           | Zinc finger protein 212                                    | sp Q9UDV6 ZN212_HUMAN          | 7                      | 0.52          |
| ZNF638                           | Zinc finger protein 638                                    | tr A0A096LNQ0 A0A096LNQ0_HUMAN | 68                     | 0.53          |
| TIMM50                           | Mitochondrial import inner membrane translocase subunit 50 | tr I0R303 I0R303_HUMAN         | 4                      | 0.60          |
| <b>Upregulated in 53BP1-KO</b>   |                                                            |                                |                        |               |
| ACOT1                            | Acyl-coenzyme A thioesterase 11                            | sp Q8WXI4 ACO11_HUMAN          | 29                     | 1.36          |
| ITGAE                            | Integrin alpha-E                                           | sp P38570 ITAE_HUMAN           | 2                      | 1.49          |
| PDE11A                           | Dual 3',5'-cyclic-AMP and -GMP phosphodiesterase 11A       | sp Q9HCR9 PDE11_HUMAN          | 1                      | 1.65          |
| FGFBP3                           | Fibroblast growth factor-binding protein 3                 | sp Q8TAT2 FGFBP3_HUMAN         | 15                     | 1.85          |
| RBM39                            | RNA-binding protein 39                                     | tr H0Y6I9 H0Y6I9_HUMAN         | 2                      | 1.38          |

## Supplementary Figure 8

### Profiling of control and 53BP1-KO hESCs.

(a) Comparison of transcript profiles of 3 (biologically independent) 53BP1-KO, and 5 (biologically independent) control hESCs by counts per million of sequencing reads for each annotated gene. Correlation coefficients are calculated by using linear model of Goodness-of-Fit package in R. (b) Gene ontology analysis of differentially expressed genes in 4 53BP1-KO clones as compared to 3 control clones. Ontology terms were ranked by *P* values (by Fisher's exact test), with the number of differentially expressed genes indicated. (c) Duplicate samples of 2 control and 3 53BP1-KO hESCs were labeled with perspective tandem mass tags and subjected to quantitative mass spectrometry analysis. (d) Comparison of proteomic profiles of 3 53BP1-KO and 2 control hESCs by mass tag signals for each quantifiable protein. 2 biological replicates from each group were analyzed by the limma package, which powers differential expression analyses. (e) Summary table of 17 proteins whose levels significantly differed (using the Limma package [33]) between 53BP1-KO and control hESCs in at least 2 pairwise comparisons.

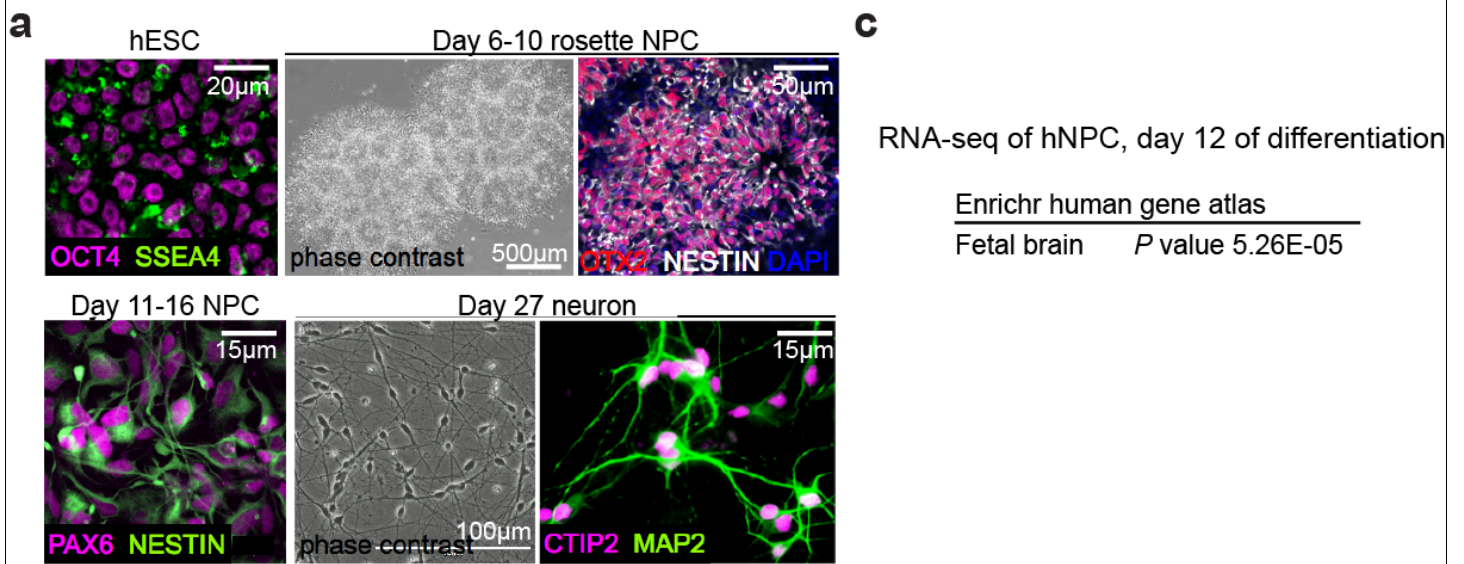

### Supplementary Figure 9

#### Characterization of hNPCs.

(a) Bright field and IF imaging of cells at stages of the neural differentiation course. OCT4 and SSEA4 are markers for hESCs; OTX2, NESTIN, and PAX6, for hNPCs; and CTIP2 and MAP2, for mature cortical neurons. Experiments were repeated 5 times to yield similar results. (b) Upregulated genes in hNPCs (Day 12 of neural lineage differentiation) that are enriched in terms related to nervous system development. (c) Analysis by Enrichr (<http://amp.pharm.mssm.edu/Enrichr/>) shows that the upregulated genes were enriched for the signature of human fetal brain. For b and c, the Fisher's exact test was used to calculate the *P* values.

**a** 53BP1 target genes

| Gene ontology terms                                                                      | # Genes | P value  |
|------------------------------------------------------------------------------------------|---------|----------|
| <b>hESC only</b>                                                                         |         |          |
| DNA strand renaturation                                                                  | 12      | 3.40E-03 |
| intraciliary anterograde transport                                                       | 7       | 1.94E-03 |
| DNA protection                                                                           | 11      | 5.47E-03 |
| regulation of G2/M transition                                                            | 8       | 6.93E-03 |
| NAD biosynthesis via nicotinamide riboside salvage pathway                               | 9       | 9.86E-03 |
| DNA replication, synthesis of RNA primer                                                 | 15      | 5.93E-03 |
| <b>both hESC and hNPC</b>                                                                |         |          |
| nuclear-transcribed mRNA catabolic process, 3'-5' exonucleolytic nonsense-mediated decay | 123     | 2.04E-27 |
| spliceosomal snRNP assembly                                                              | 173     | 4.30E-19 |
| late viral transcription                                                                 | 97      | 2.24E-22 |
| mRNA splicing, via spliceosome                                                           | 176     | 6.71E-19 |
| <b>hNPC only</b>                                                                         |         |          |
| axon guidance                                                                            | 30      | 1.92E-03 |
| commissural neuron axon guidance                                                         | 24      | 1.10E-03 |
| retinal ganglion cell axon guidance                                                      | 24      | 1.10E-03 |
| sensory neuron axon guidance                                                             | 23      | 2.00E-03 |
| sympathetic neuron axon guidance                                                         | 23      | 2.00E-03 |
| axon choice point recognition                                                            | 23      | 2.00E-03 |

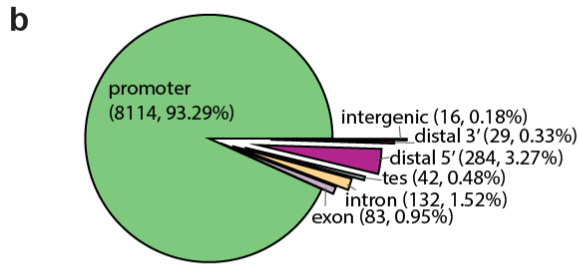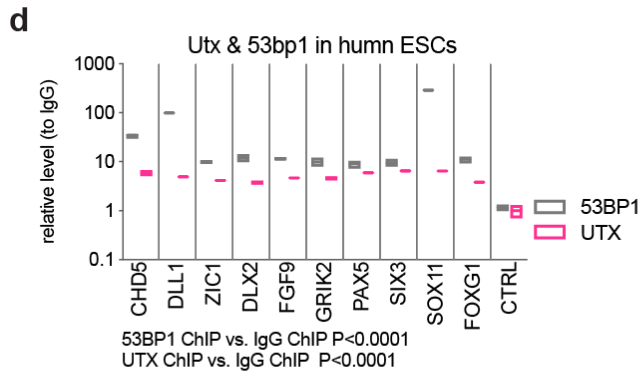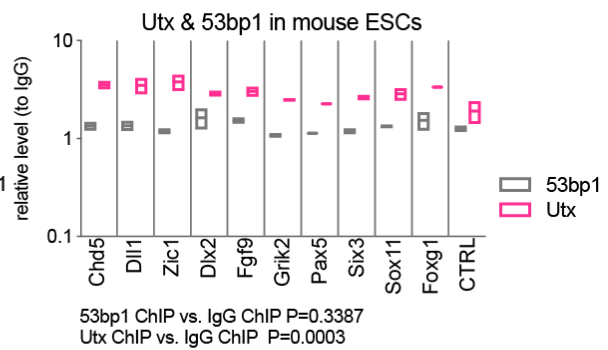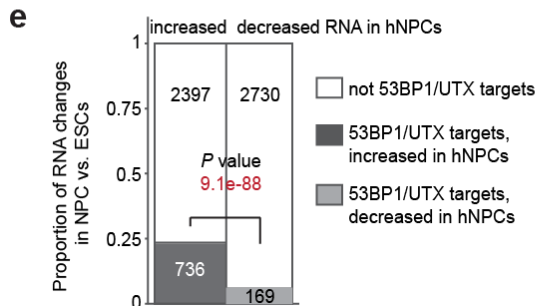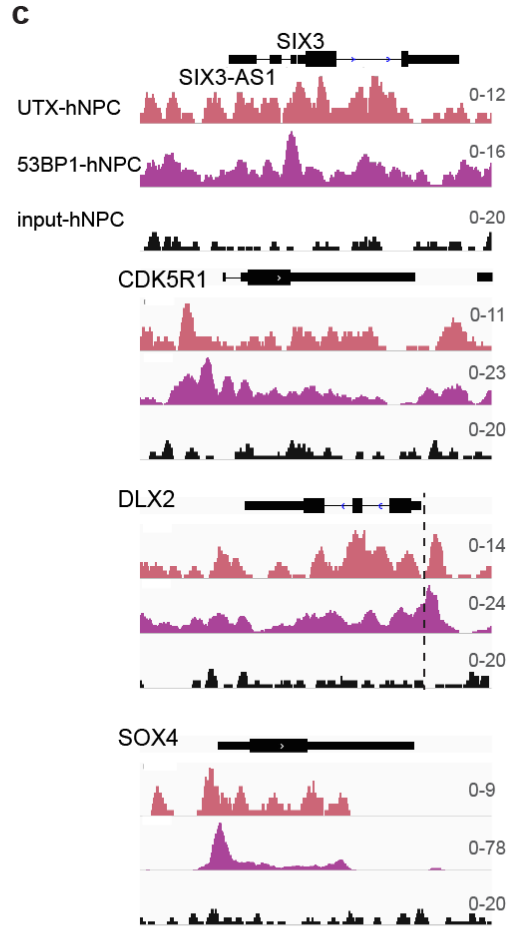

## Supplementary Figure 10

### 53BP1 binding correlates with the activation of neurogenic genes in hNPCs.

(a) Gene ontology analysis of 53BP1 target genes. The ontology terms were ranked by  $P$  values (by the Fisher's exact test), with the number of bound genes indicated. (b) Pie charts indicate the proportions of UTX and 53BP1 enrichment. 'Distal' indicates regions that are 5 kb from transcription start sites. 'Tes' denotes transcription termination sites. (c) Representative 53BP1 and UTX ChIPseq tracks, with input track as negative control, at the gene locus of *SIX3*, *CDK5R1*, *DLX2*, and *SOX4* in hNPCs. Experiments were repeated 2 times to yield similar results. (d) ChIP-qPCR analysis of UTX and 53BP1 binding to the promoters of neurogenic genes in human and mouse ESCs. N=3 qPCR results; from 2 biologically independent experiments. Center values and error bars are mean and standard deviation. \* and \*\* indicate  $P < 0.05$  and  $P < 0.001$  by one-sided Student's  $t$ -test. (e) Differentially expressed genes in hNPCs vs. hESCs were correlated to 53BP1 and UTX targets in hNPCs. The comparison of the 735 target genes that are upregulated/increased in hNPCs to the 169 target genes that are downregulated/decreased in hNPCs yielded  $P = 9.1 \times 10^{-88}$  by the Fisher's exact test.

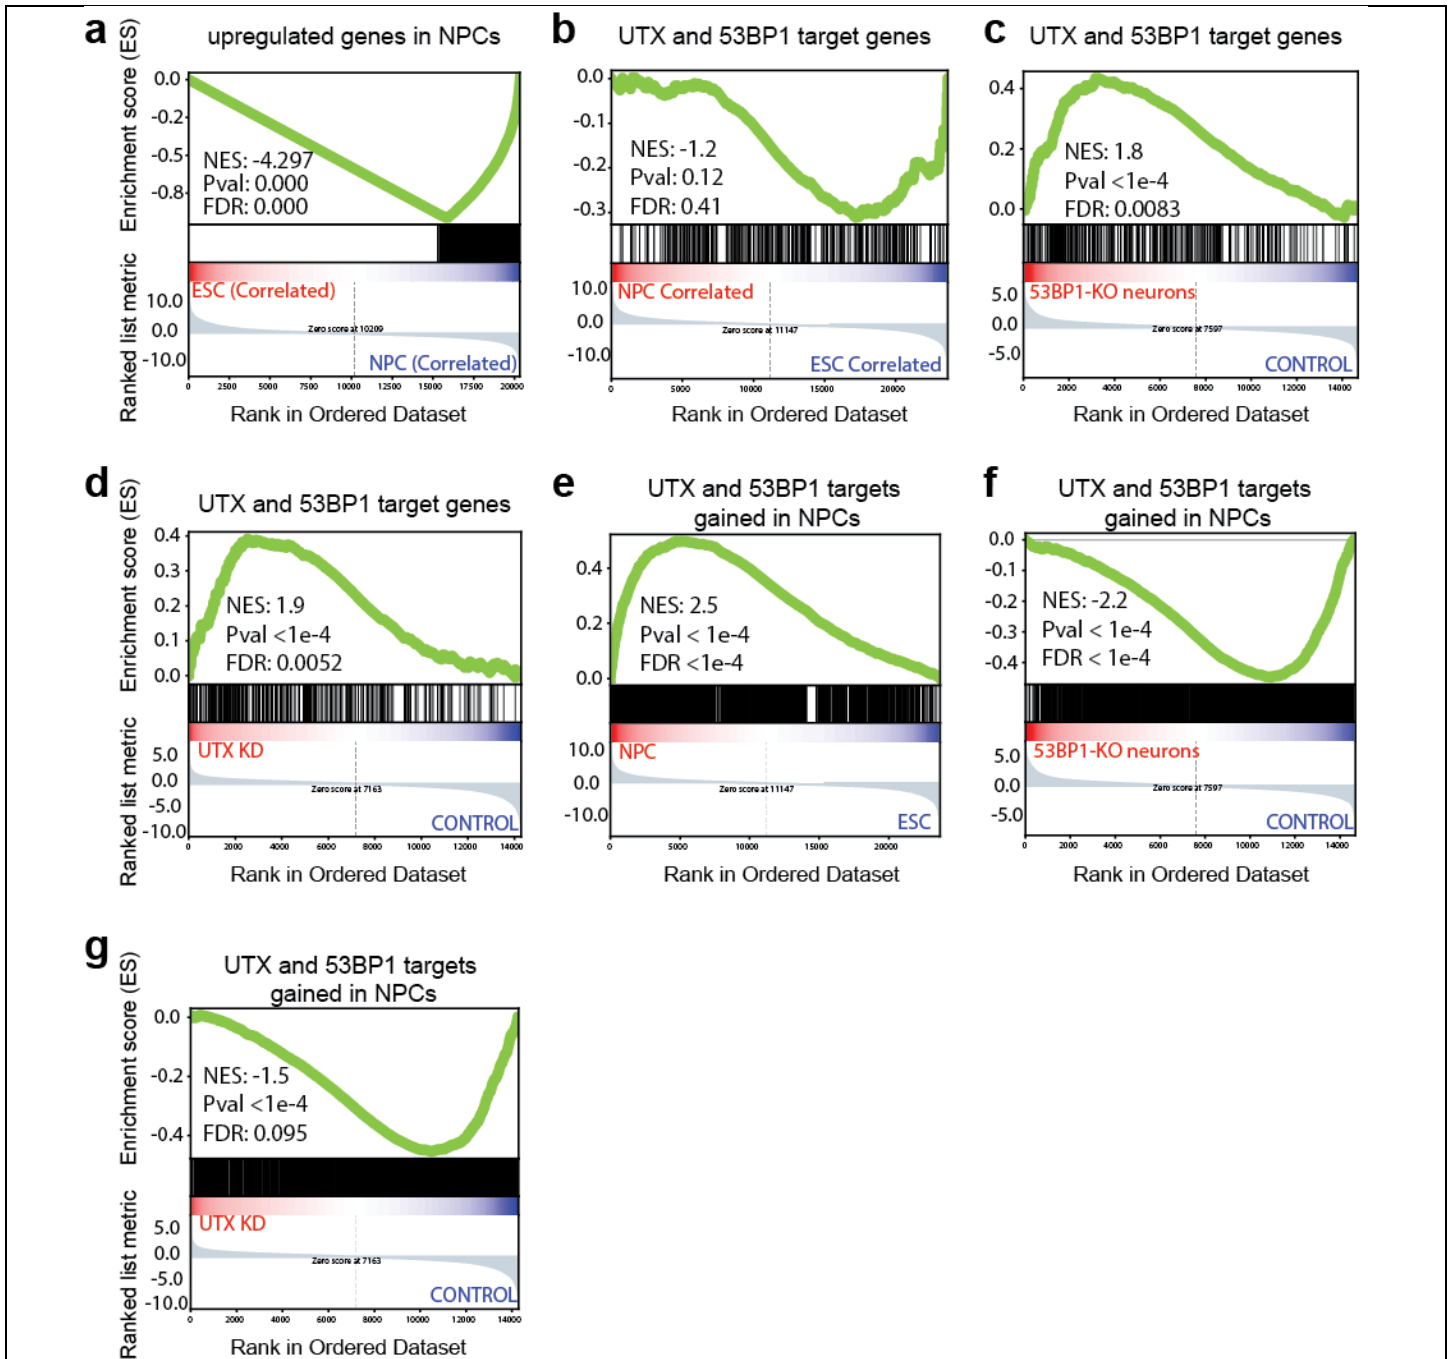

**Supplementary Figure 11**

**Gene set enrichment analyses of UTX and 53BP1 targets in hESCs or target genes gained in hNPCs.**

(a) Enrichment test of upregulated genes in hNPCs (vs. hESCs) with upregulated genes in hESCs (vs. hNPCs) yielded strong negative correlation. Enrichment test of all UTX and 53BP1 target genes in hESCs with (b) differentially expressed genes in hNPCs (vs. hESCs) yielded no significance, (c) differentially expressed genes in 53BP1-KO mutant vs. control yielded significant positive correlation, and (d) differentially expressed genes in UTX mutant vs. control yielded significant positive correlation. Enrichment test of UTX and 53BP1 target genes gained during hNPC differentiation with (e) differentially expressed genes in hNPCs (vs. hESCs) yielded strong positive correlation, (f) differentially expressed genes in 53BP1-KO mutant vs. control yielded significant negative correlation, and (g) differentially expressed genes in UTX mutant vs. control significant negative correlation. For all GSEA, ChIP were 6 biological samples in hESCs and 2 biological samples in hNPCs, and *P* values are nominal *P* values.



**a** Day 17, neural differentiation, before plating into neuronal maturation media

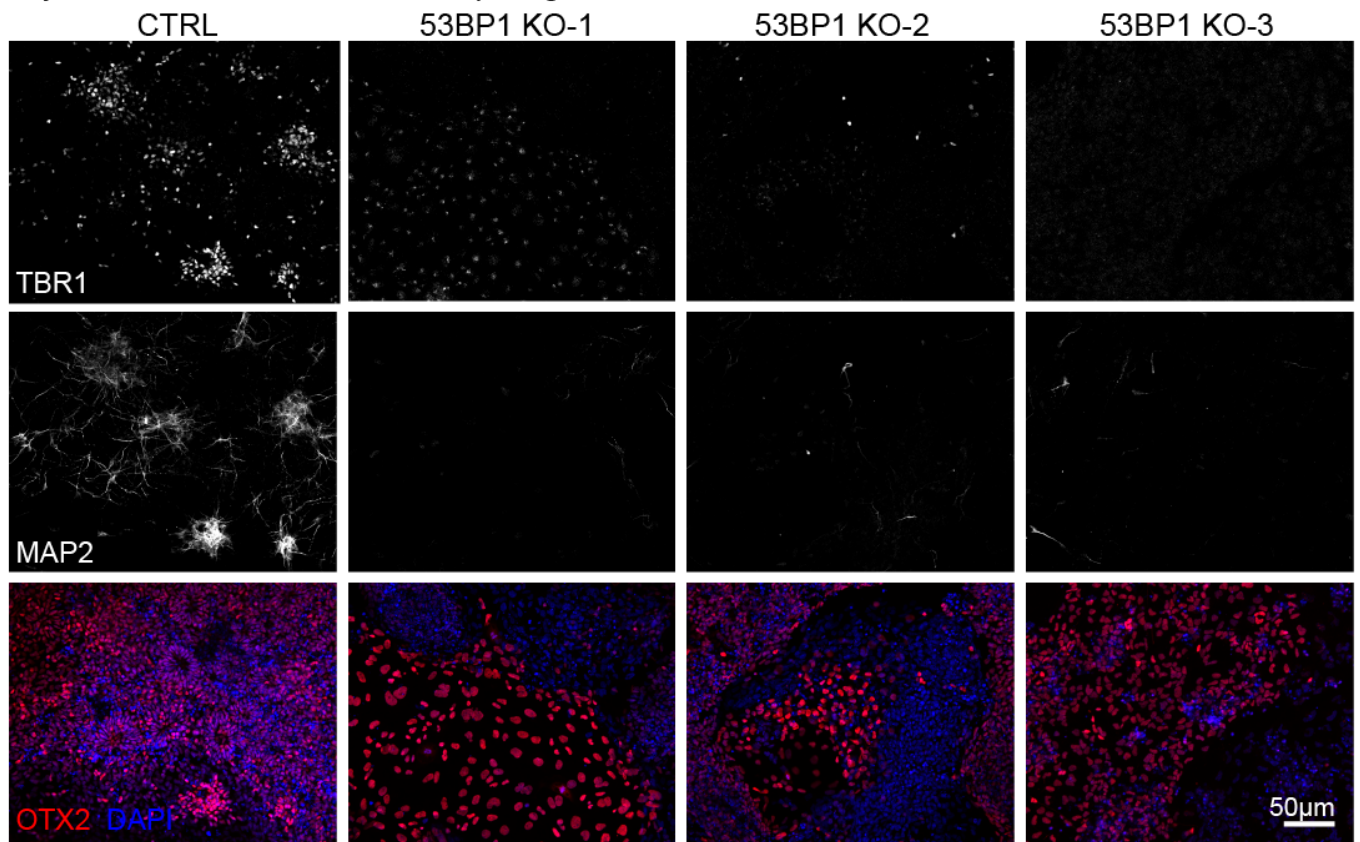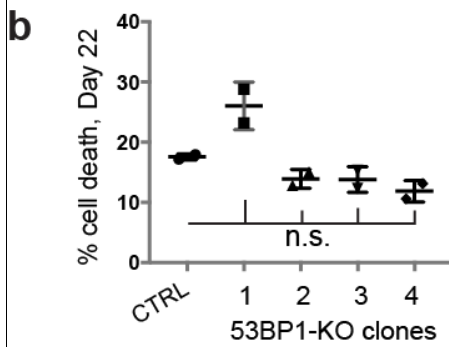

**c** Day 22, neural differentiation, after plating into neuronal maturation media

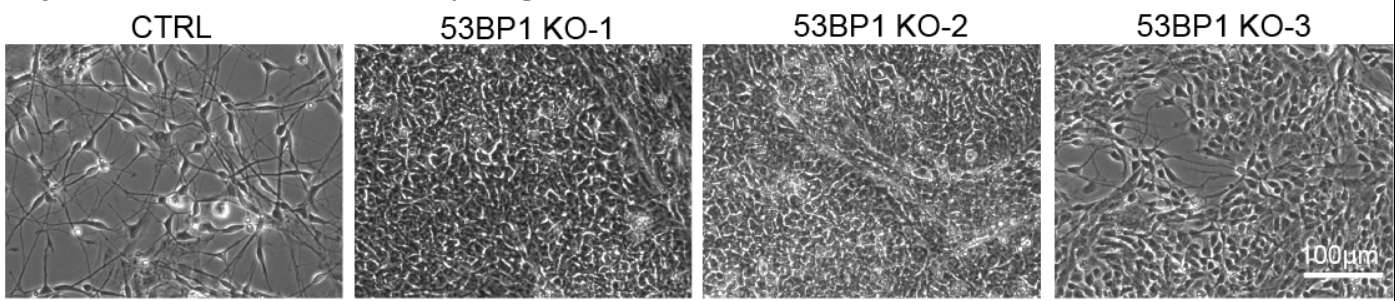

brightfield

**Supplementary Figure 12**

**Compared to control cells, 53BP1-KO hNPCs failed to commit to neuronal differentiation.**

(a) TBR1, MAP2, and OTX2 IF of control and 53BP1-KO hNPCs at day 17 of the neural lineage differentiation. Bar, 100 $\mu$ m. Cells were analyzed before being plated into neuronal maturation media. (b) Percentages of apoptotic cells determined via annexin v and propidium iodide FACS in control and 4 53BP1-KO cells at day 22 of differentiation. N=2 biological samples. n.s., not significant by one-sided Student's *t*-test. (c) Bright-field imaging of control and 53BP1-KO hNPCs at day 22 of differentiation, after 5 days in neuronal maturation media. Cells were plated at the same density at day 17. Because control cells have stopped dividing 3 days prior, their density was much sparser than those of 53BP1-KO cells. Experiments were repeated 3 times to yield similar results.



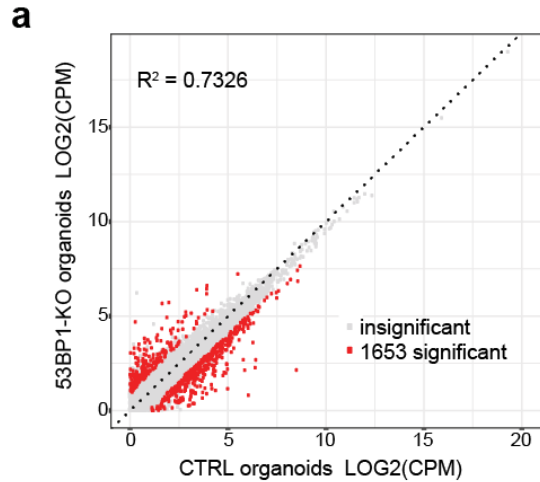

**c** Upregulated in 53BP1-KO cortical organoids

| Term                                                                  | Overlap | P-value  |
|-----------------------------------------------------------------------|---------|----------|
| collagen fibril organization                                          | 25/154  | 1.84E-07 |
| extracellular matrix disassembly                                      | 27/198  | 2.13E-06 |
| biofilm matrix organization                                           | 22/143  | 2.50E-06 |
| cellulose microfibril organization                                    | 22/143  | 2.50E-06 |
| extracellular matrix organization                                     | 22/143  | 2.50E-06 |
| fibronectin fibril organization                                       | 22/144  | 2.81E-06 |
| extracellular matrix organization involved in endocardium development | 22/143  | 2.50E-06 |
| basement membrane organization                                        | 22/144  | 2.81E-06 |
| gene expression involved in extracellular matrix organization         | 22/146  | 3.55E-06 |
| extracellular matrix assembly                                         | 22/149  | 4.99E-06 |

**b** Downregulated in 53BP1-KO cortical organoids

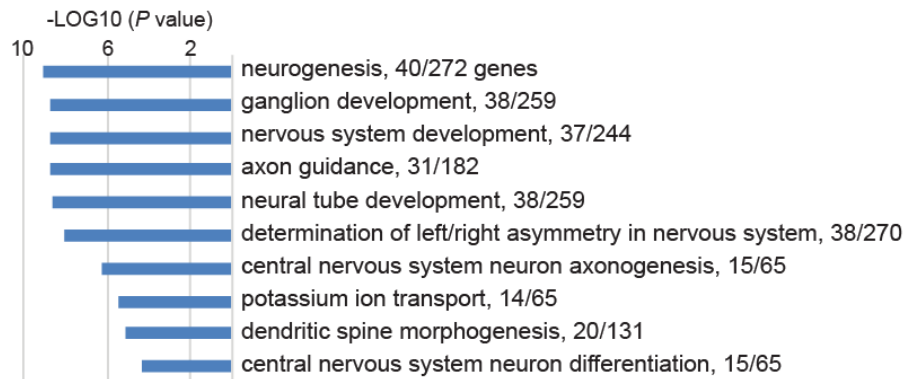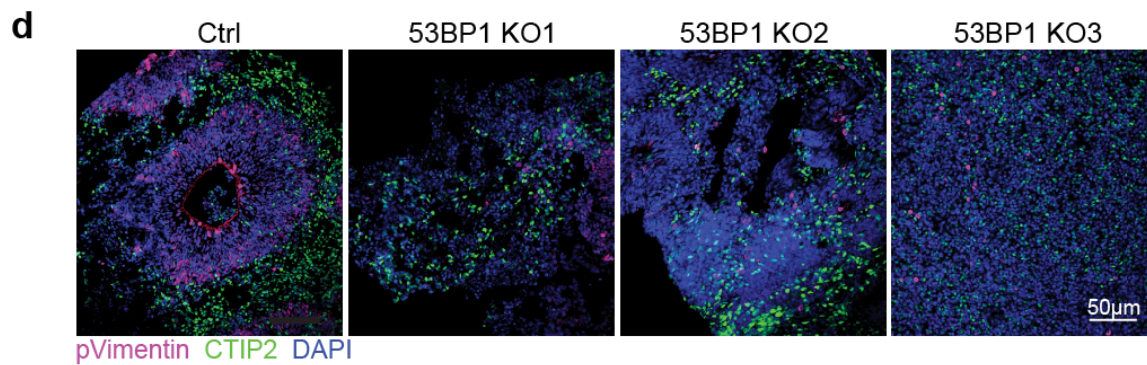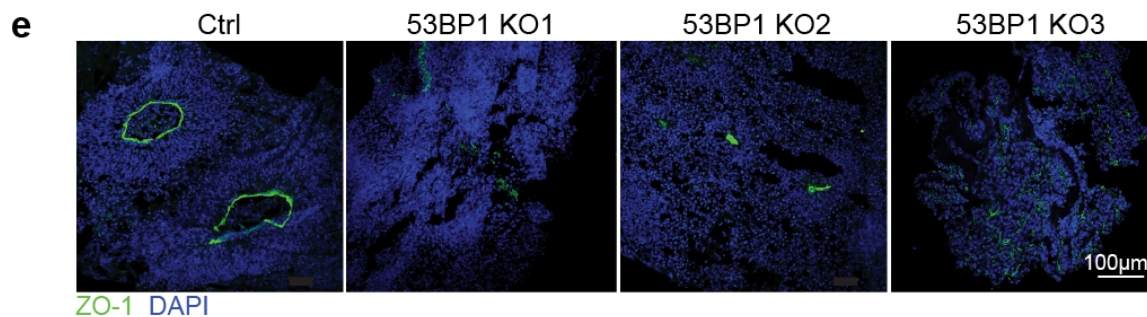

## Supplementary Figure 13

### **53BP1 promotes neurogenic gene expression and development of cortical organoids.**

(a) Comparison of transcript profiles of 53BP1-KO and control organoids by counts per million of sequencing reads for each annotated gene by using the modified t test from voom package in R. Two biological samples each from control, 53BP1-KO1, and 53BP1-KO2 were analyzed. Enriched terms of (b) downregulated genes and (c) upregulated genes in 53BP1-KO cortical organoids (vs. control); *P* values by the Fisher's exact test. Immunofluorescence of (d) phosphorylated-VIMENTIN and CTIP2, and (e) ZO-1, of sections from organoids at day 45 of differentiation. Bar, 50  $\mu$ m. Experiments were repeated 2 times for d and e to yield similar results.

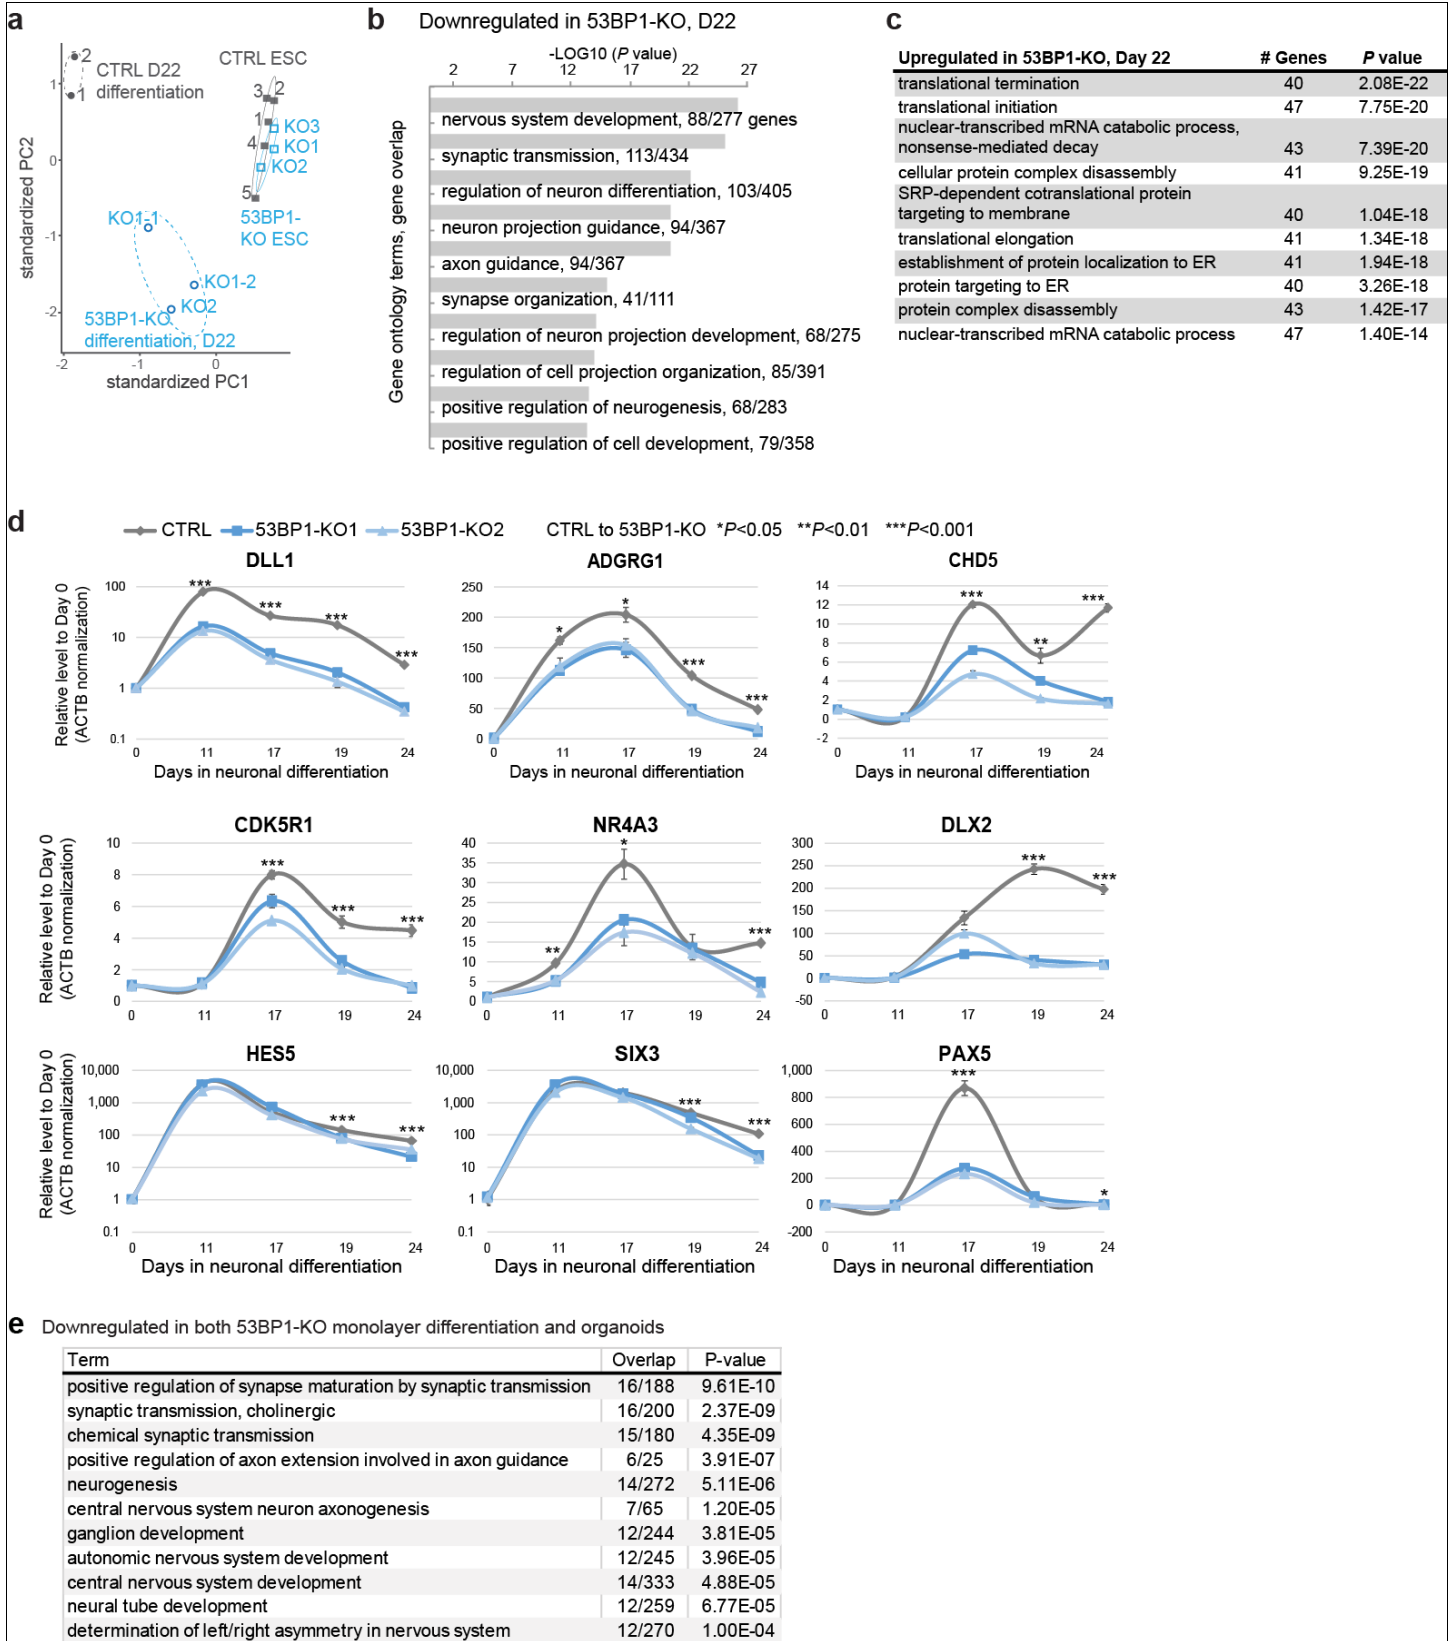

Supplementary Figure 14

**Gene expression profiling of control and 53BP1-KO cells during the course of neuronal differentiation.**

(a) Principal component analysis of gene expression profiles of control hESCs and hNPCs at day 22 of differentiation. Dotted lines encircle different experimental groups. Numbers indicate clones; 2 sets of differentiation were performed. Gene ontology analyses of (b) downregulated and (c) upregulated expressed genes between 2 control and 3 53BP1-KO clones at day 22 of differentiation. The ontology terms were ranked by  $P$  value significance, with the number of bound genes indicated. (d) Transcript profiling of control cells and 2 53BP1-KO clones at days 0 (hESC state), 11, 17, 19, and 24 of differentiation.  $N=3$  independent RT samples. Mean and standard deviation are indicated, with \*, \*\*, \*\*\* respectively indicating  $P<0.05$ , 0.01, or 0.001 by one-sided Student's  $t$ -test. (e) Gene ontology analyses of downregulated genes that are shared in both 53BP1-KO monolayer differentiation (vs. control) and 53BP1-KO cortical organoids (vs. control). The ontology terms were ranked by  $P$  value significance, with the number of bound genes indicated. For b, c, and e,  $P$  values were calculated by the Fisher's exact test.







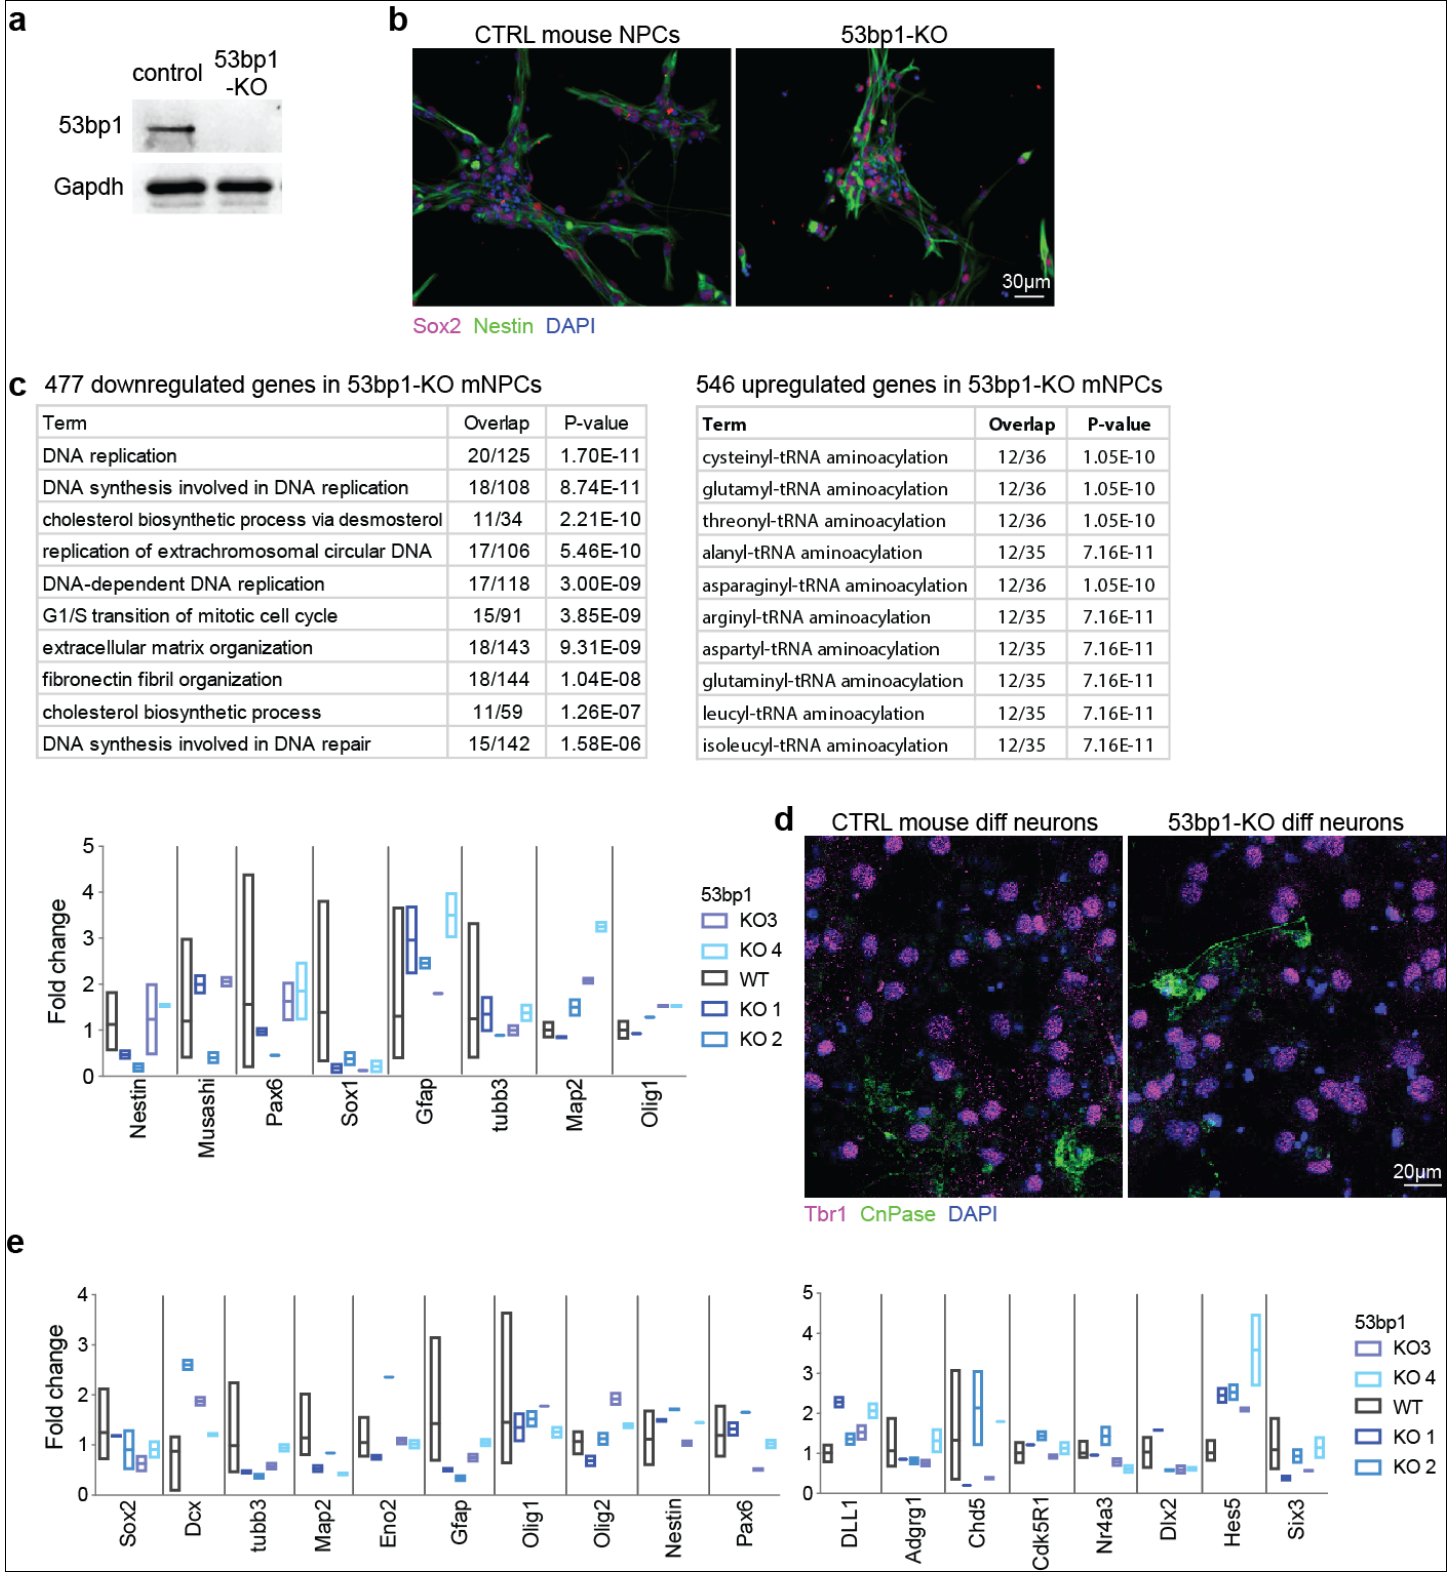

Supplementary Figure 16

Murine 53bp1 does not impact mNPCs. (a) WB analysis of control and 53bp1-KO mNPCs.

(b) IF of Sox2 and Nestin in control and 53bp1-KO mNPCs. Bar, 30 $\mu$ m. (c) Gene ontology analysis of differentially expressed genes between RNA-seq datasets from 4 control and 4 53bp1-KO mNPCs. RT-qPCR profiling of key neurodevelopmental genes, with n=3 biological RT samples and no difference by the ANOVA test. Mean and standard deviation are indicated. (d) IF of Tbr1 and CnPas2 in control and 53bp1-KO mNPCs at day 21 of differentiation. Bar, 30 $\mu$ m. (e) Transcript profiling by RT-qPCR of control and 53bp1-KO cells at day 21 of differentiation. The assayed genes are key neurodevelopmental genes and those perturbed by 53BP1 KO in hNPCs. Mean and standard deviation are indicated. Control are sibling heterozygous 53bp1  $-/+$  mNPCs. N=3 biological RT samples. No significant differences observed between control and 53bp1-KOs by the ANOVA test. Experiments were repeated 3 times for a and b and 2 times for d to yield similar results. WB images are cropped.



**a** mouse 53bp1 exon 12

WT aacagaagactctccacaacctccttgccttcagtgagagacgaacctgtcagaccgcatcaggagaca (70bp) tgggaccagaggcgcatgccagcagcttgagaagccc (210bp) ctgagatcacttgaggttt  
 mut aacagaagactctccacaacctccttgccttcagtgagagacgaacctgtca-----ctgaggttt

Domain 3iii (from exon 12)

Exon13

WT DTPEEKRIECDGDSKAETTEKDAVTEDSPQPPLPSVRDEPVRPQDQETQQPQVQKEKESPVTVDAEVADDDKQLGPEGACQQLKAPACASQSFCESSSETPFHFTLPKEGDIIPPLTGA  
 mut DTPEEKRIECDGDSKAETTEKDAVTEDSPQPPLPSVRDEPV-----SSETPFHFTLPKEGDIIPPLTGA

**b** IP from mut

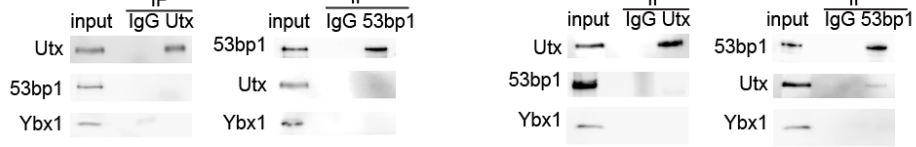

**c**

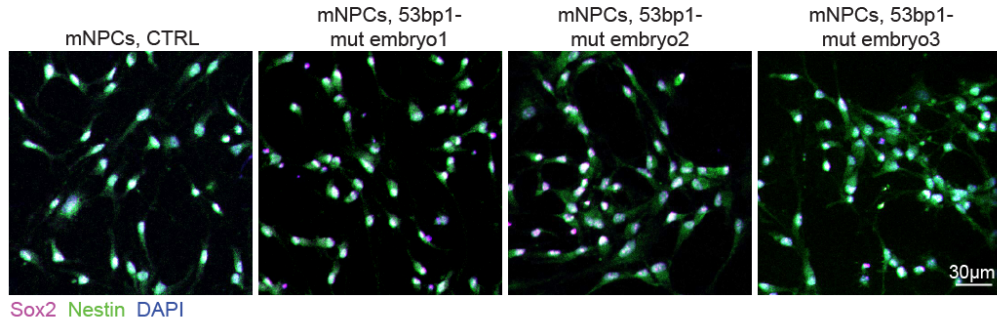

**d**

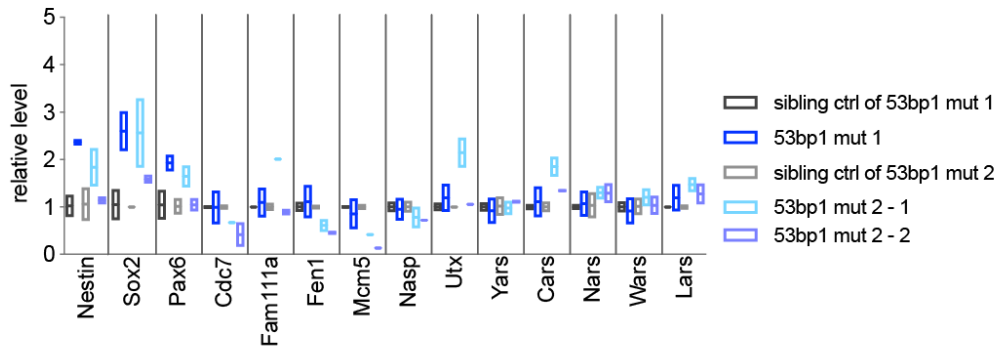

**e**

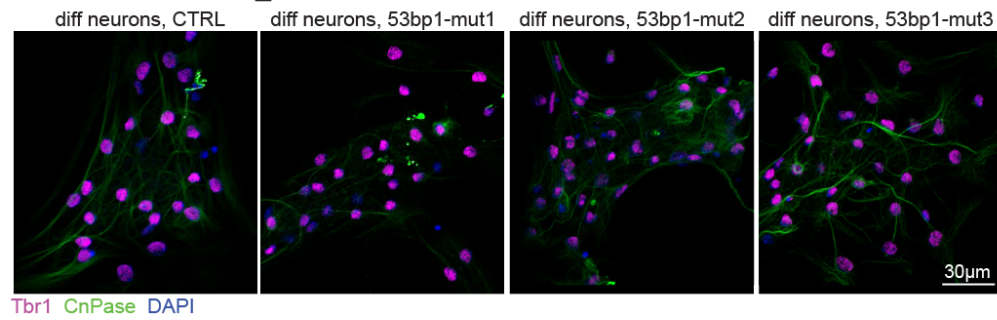

**f**

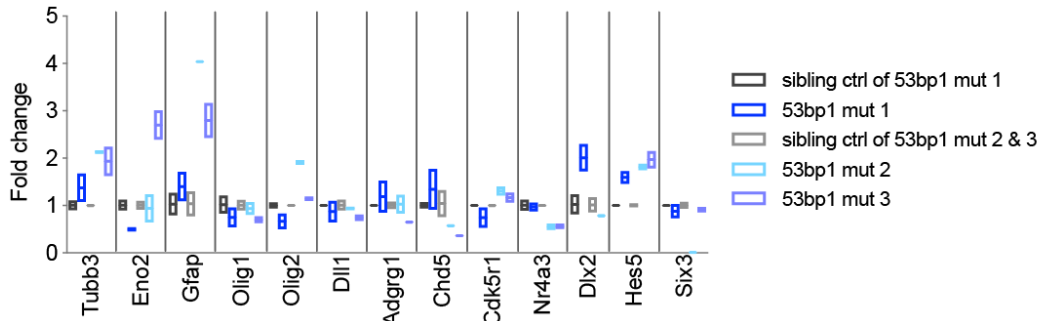

## Supplementary Figure 17

### Disruption to Utx-53bp1 binding does not impact mNPCs.

(a) CRISPR (red) sequences and mutation in the murine 53bp1 gene locus. Amino acids within domain 3iii of the mouse 53bp1. Dots indicate deletions. (b) WB analysis of IP from 53bp1 mutant and control embryos. (c) IF of Sox2 and Nestin in control and 53bp1 mutant mNPCs. Bar, 30 $\mu$ m. (d) Transcript profiling of control and 53bp1 mutant mNPCs. The assayed genes are key neurodevelopmental genes and those perturbed by 53bp1 KO in mNPCs. N=3 biological RT samples and no difference by the ANOVA test. (e) IF of Tbr1 and CnPas in control and 53bp1 mutant cells at day 14 of differentiation. Bar, 30 $\mu$ m. (f) Transcript profiling of control and 53bp1-KO cells at day 21 of differentiation. The assayed genes are key neurodevelopmental genes and those perturbed by 53BP1 KO in hNPCs. Mean and standard deviation are indicated. N=3 biological RT samples. No significant differences were observed between 53bp1 mutant and control groups by the ANOVA test. 53bp1 mutant 1 came from a genetic cross / mother separate from that of mutants 2 and 3. Experiments were repeated 2 times for b, c, and e to yield similar results. WB images are cropped.

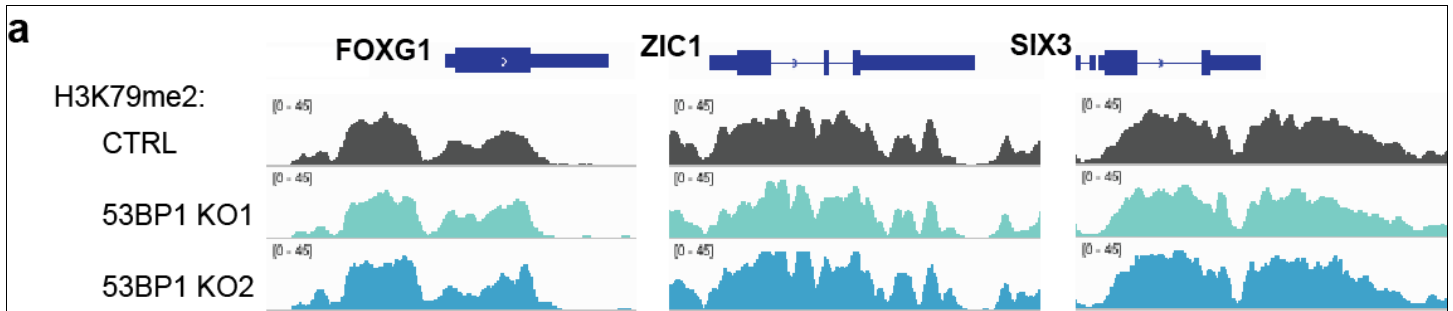

**b** Pairwise comparison of H3K79me2 ChIP-seq in differentiating neurons

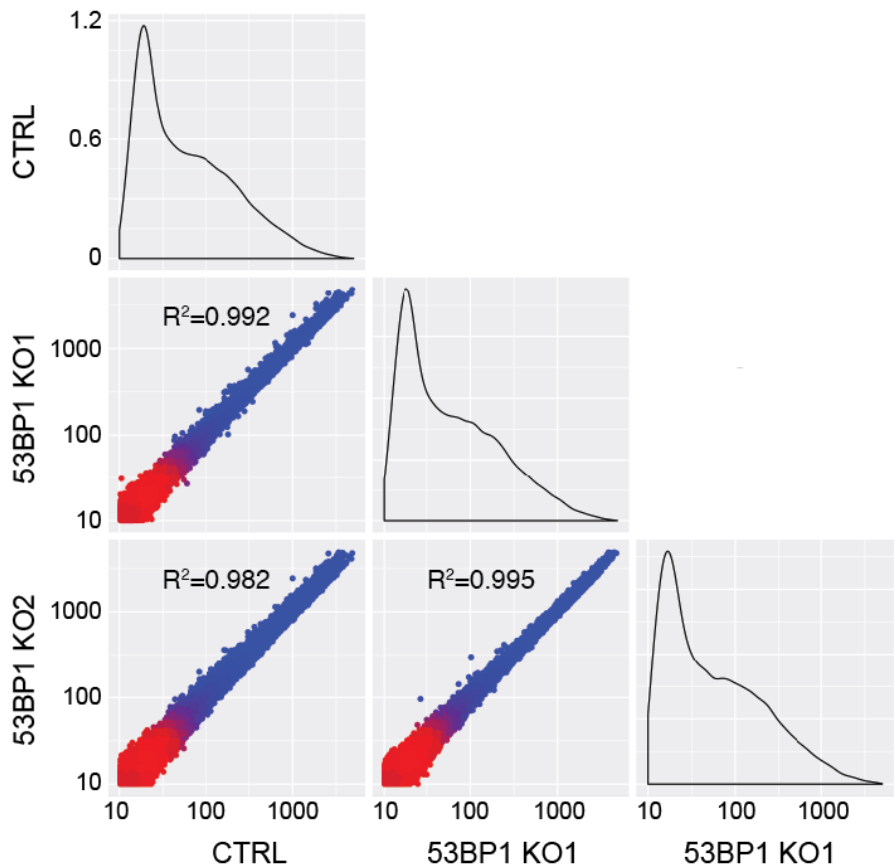

**Supplementary Figure 18**

**53BP1 does not affect H3K79me2 localization in hESCs.**

(a) Representative H3K79me2 ChIPseq tracks at neurogenic genes in control and 53BP1-KO hNPCs at day 17 of differentiation. Experiments were repeated 2 times to yield similar results. (b) High correlation between H3K79me2 ChIP-seq datasets from control and 53BP1-KO hNPCs at day 17 of differentiation.  $R^2$  values are Pearson correlation coefficients. 1 control and 2 independent 53BP1-KO samples were analyzed.

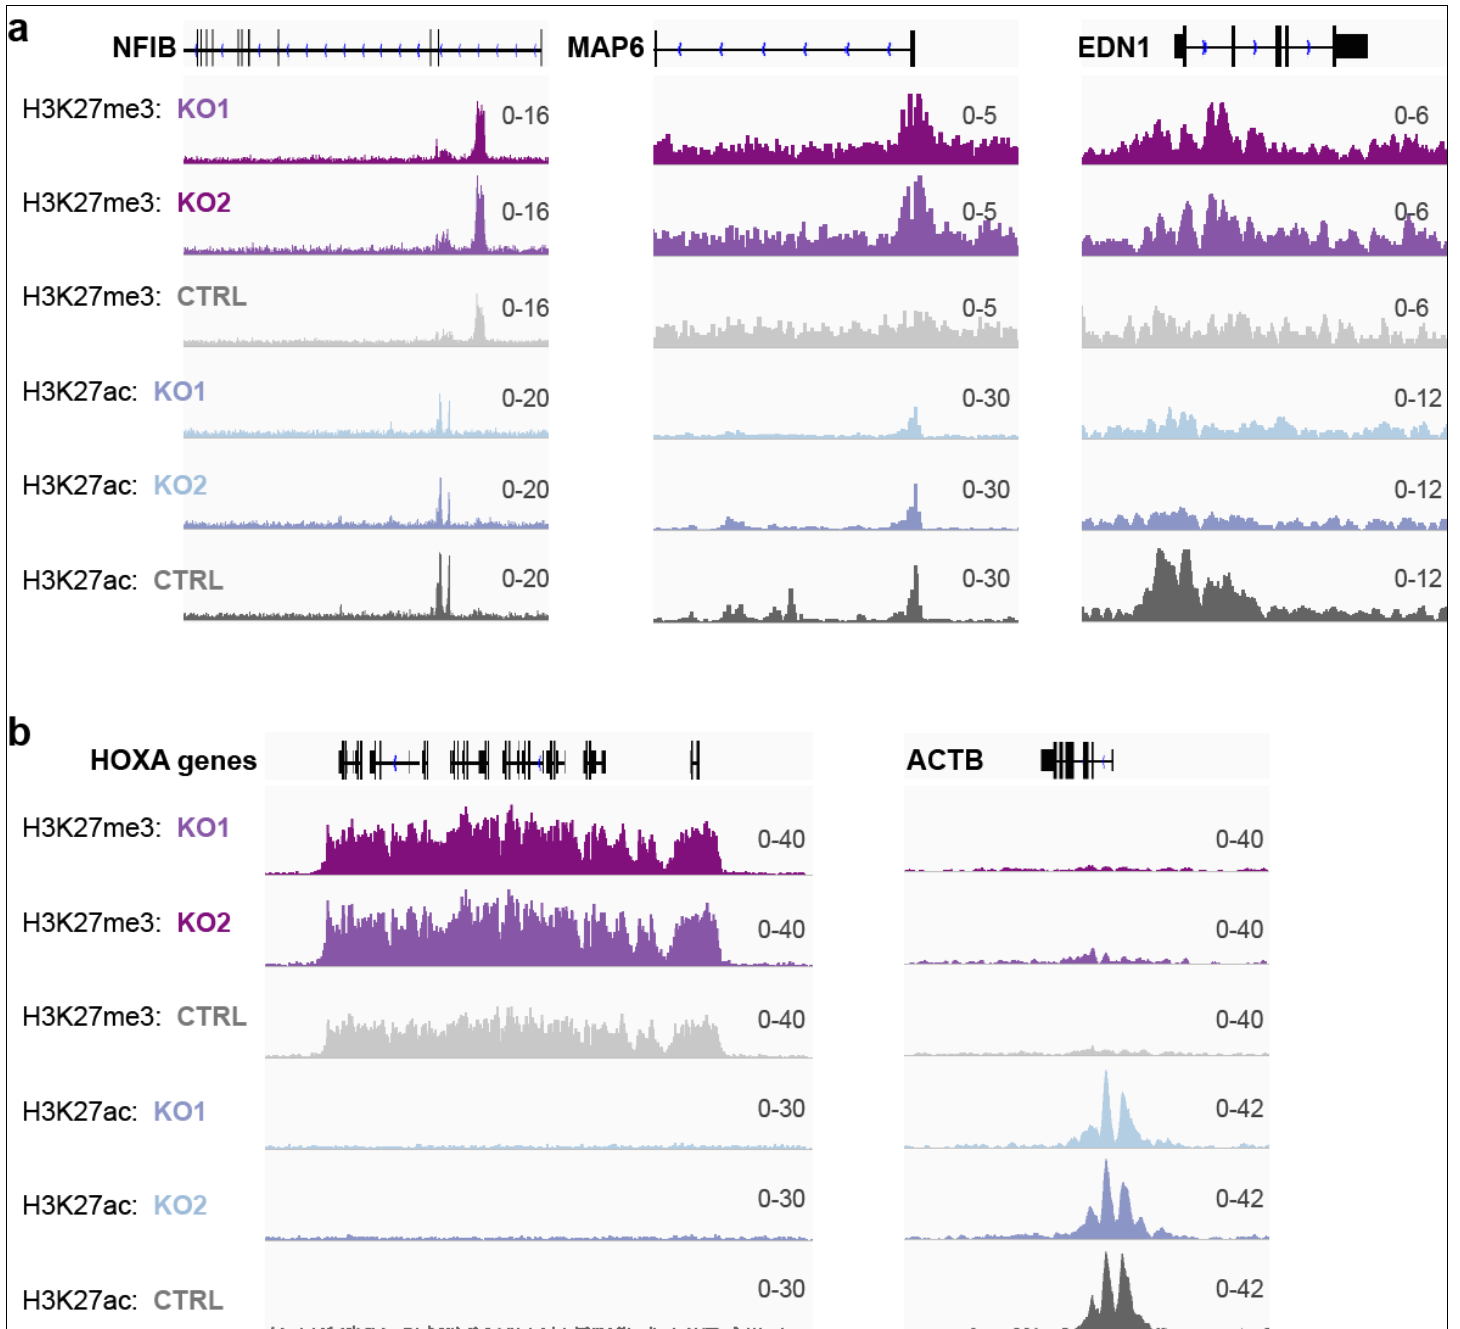

**Supplementary Figure 19**

**Histone H3K27me3 and H3K27ac ChIP-seq tracks at different loci of control and 53BP1-KO cells at day 22 of neuronal differentiation.**

In contrast to Fig 6, the ChIPseq tracks in control cells are displayed separately from those in 53BP1-KO cells. (a) The NFIB, MAP6, and EDN1 genes were downregulated in 53BP1-KO hNPCs and associated with significantly higher H3K27me3 but significantly lower H3K27ac. (b) Genes in the HOXA cluster were silenced and associated with high H3K27me3 level but non-detectable H3K27ac. The ACTB gene was expressed and associated with non-detectable H3K27me3 level and high H3K27ac. Experiments were repeated 2 times to yield similar results.

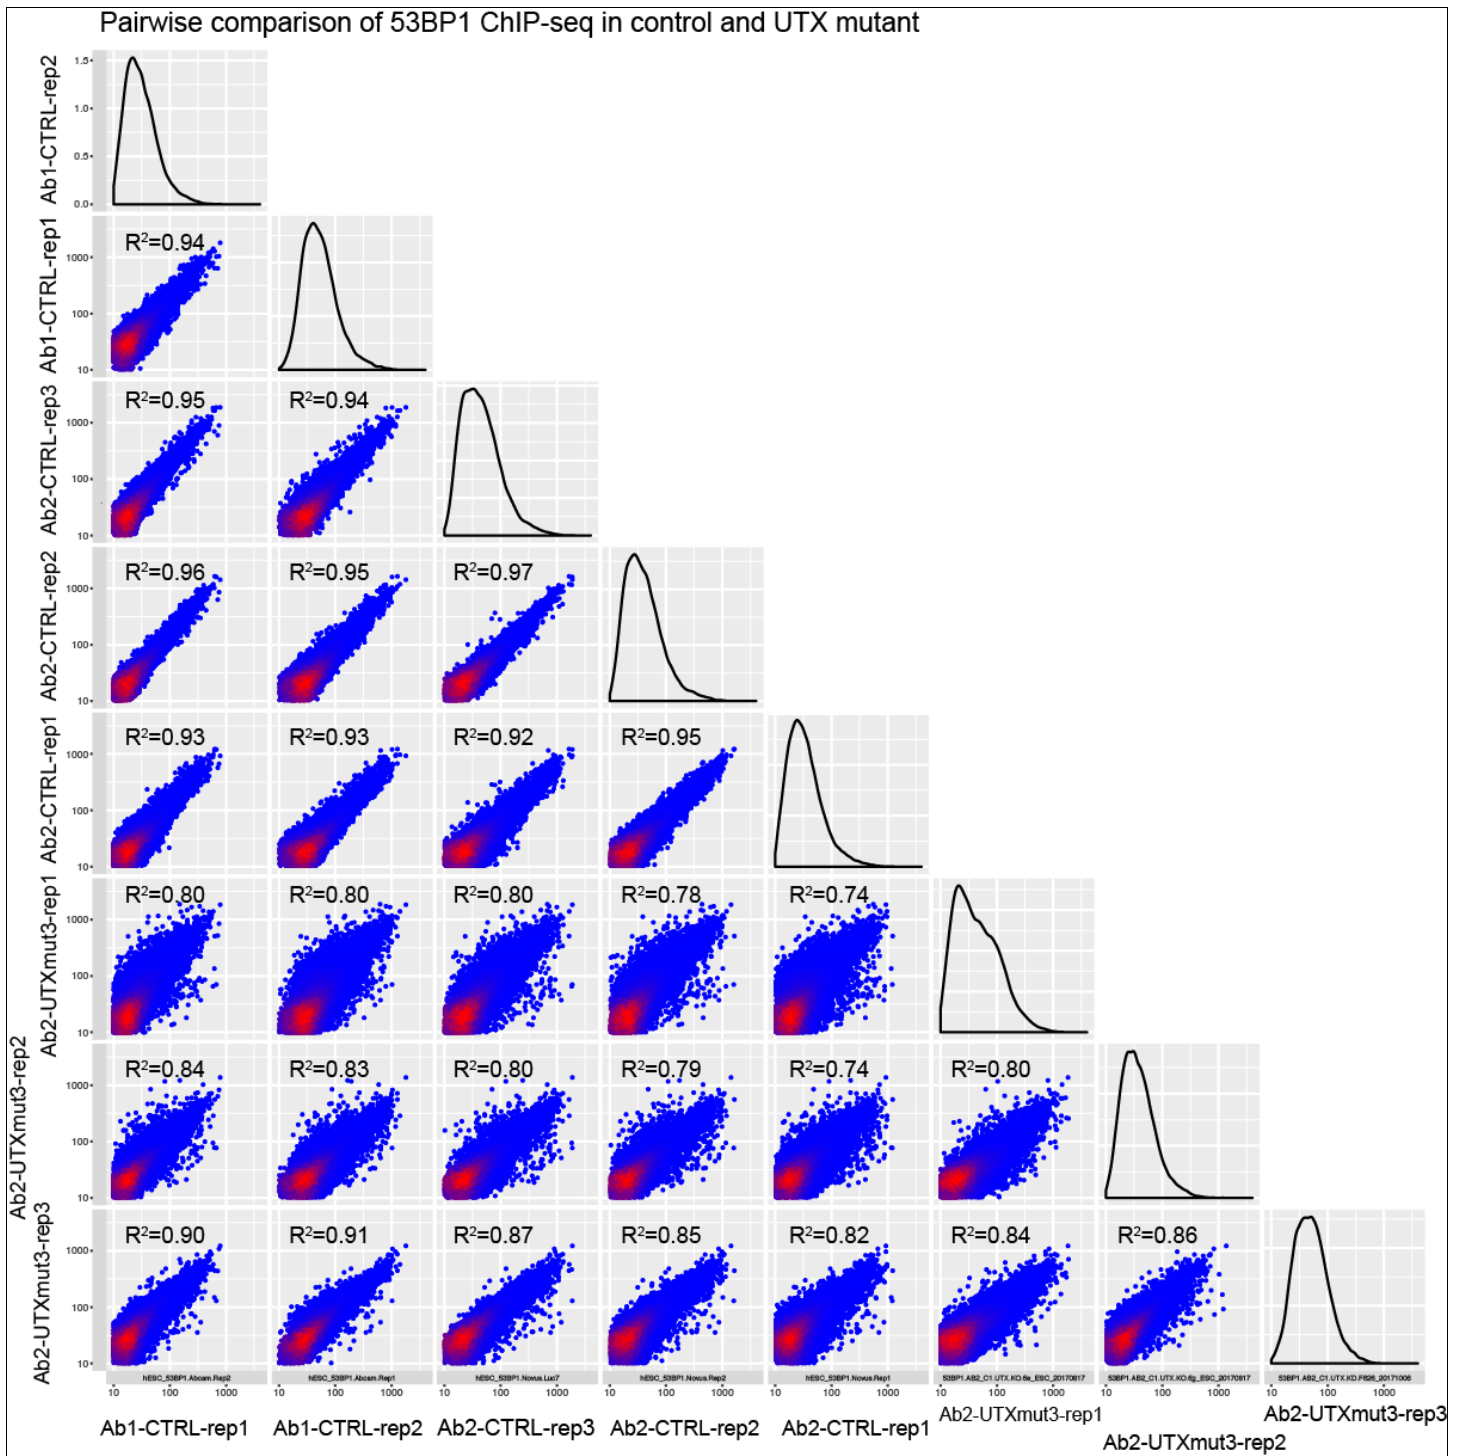

Supplementary Figure 20

**53BP1 genome-wide bindings change between control and UTX mutant differentiating neurons.**

Each dataset is ChIP-seq signals at binned genomic regions. Pairwise counts per million of the datasets, with respective  $R^2$  values, which are Pearson correlation coefficients. Red indicates a higher density of points. Diagonal curve plots show the kernel density of ChIP-seq reads in each dataset. 3 biologically independent 53BP1 ChIP with UTX-depleted and 5 biologically independent 53BP1 ChIP with control samples were analyzed.

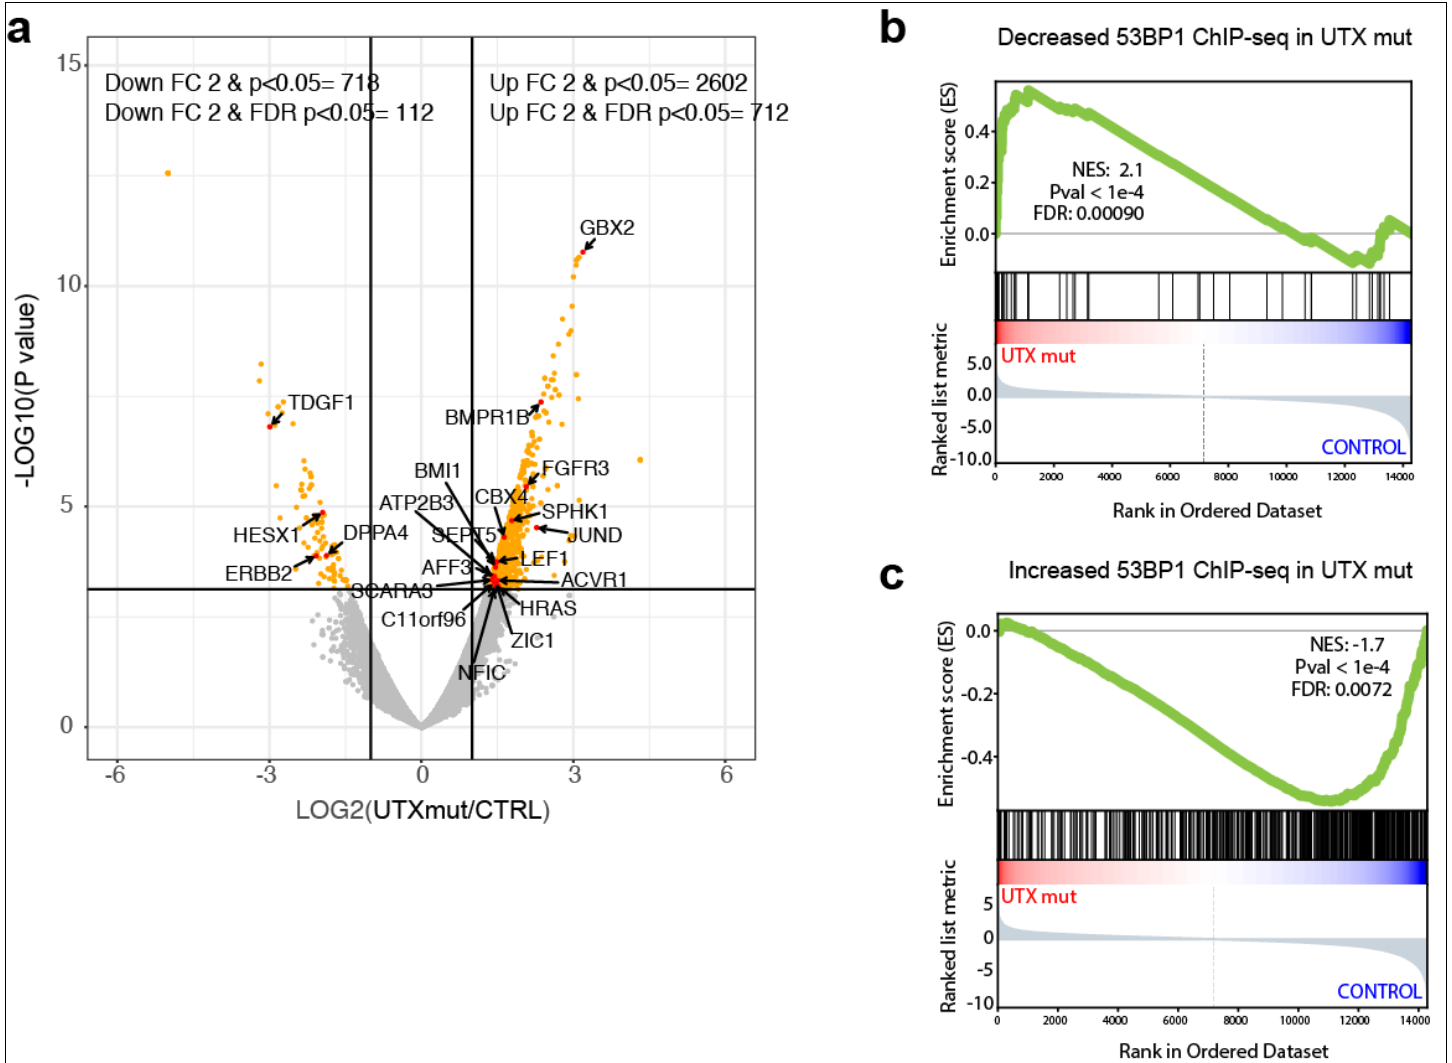

**Supplementary Figure 21**

**UTX positively and negatively regulates 53BP1 binding to chromatin.**

(a) Volcano plot of 53BP1 ChIP-seq signals in UTX mutant / control differentiating neurons. Analysis was done with modified t test in the voom package of R. Notable development-relevant genes are noted. Gene set enrichment analysis of (b) genes having decreased 53BP1 binding or (c) genes having increased 53BP1 binding with differentially expressed genes in UTX mutant vs. control differentiating neurons. For a-c, 3 biologically independent 53BP1 ChIP with UTX-depleted and 5 biologically independent 53BP1 ChIP with control samples were analyzed.

**a** Pairwise comparison of UTX ChIP-seq in differentiating neurons

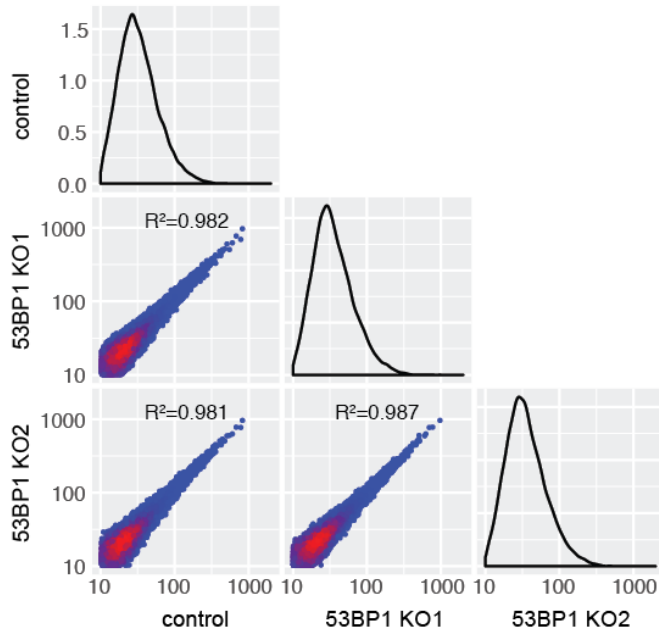

**b**

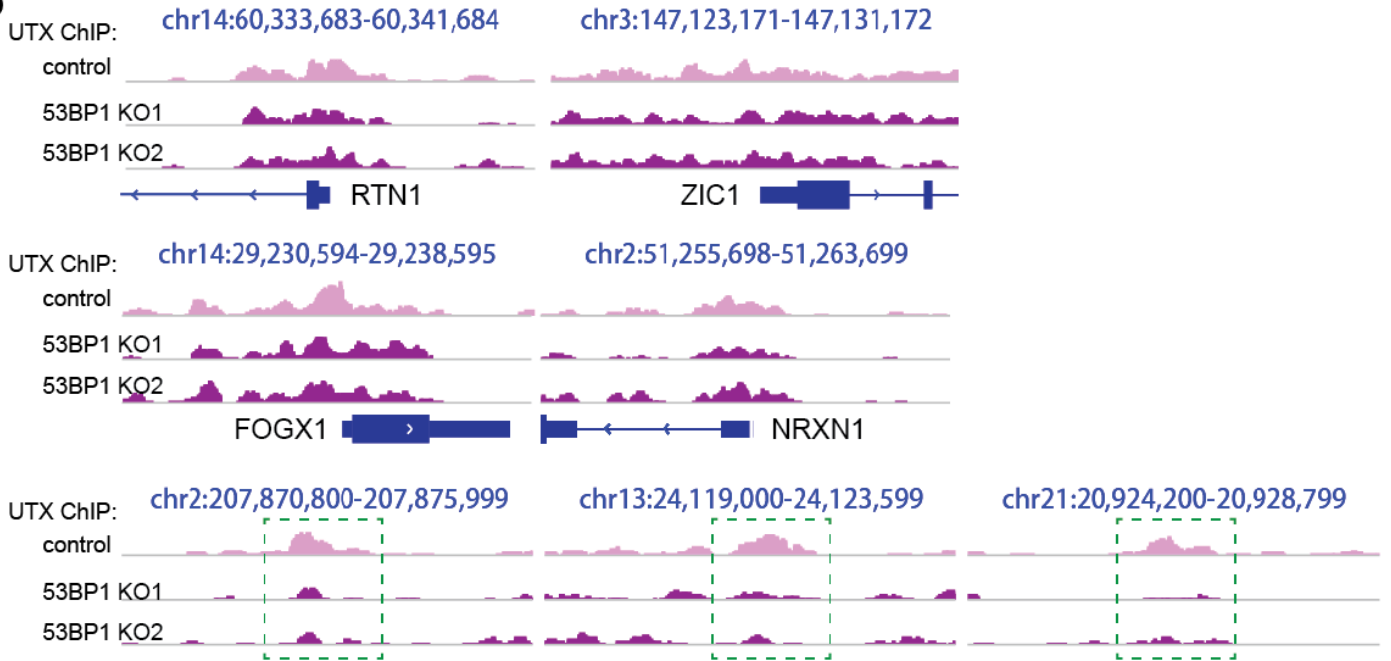

**c**

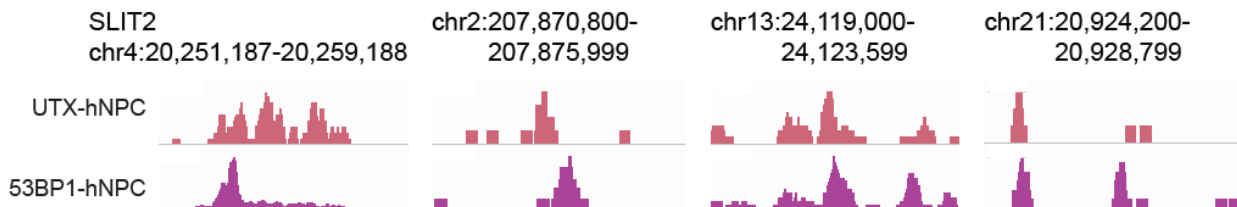

## Supplementary Figure 22

### 53BP1 affects UTX binding to select gene targets.

(a) Pairwise comparison of UTX ChIP-seq datasets at binned genomic regions in control and 53BP1-KO at day 17 of differentiation. Pairwise counts per million of the datasets, with respective  $R^2$  values, which are Pearson correlation coefficients. Red indicates a higher density of points. Diagonal curve plots show the kernel density of ChIP-seq reads in each dataset. 2 biological samples were analyzed. (b) UTX ChIPseq tracks at neurogenic genes and gene targets with changed UTX binding in control and 53BP1-KO hNPCs at day 17 of differentiation. Dotted green boxes indicate sites with lower UTX levels. (c) UTX and 53BP1 ChIPseq tracks at different sites in control hNPCs at day 15 of differentiation. Experiments were repeated 2 times to yield similar results.



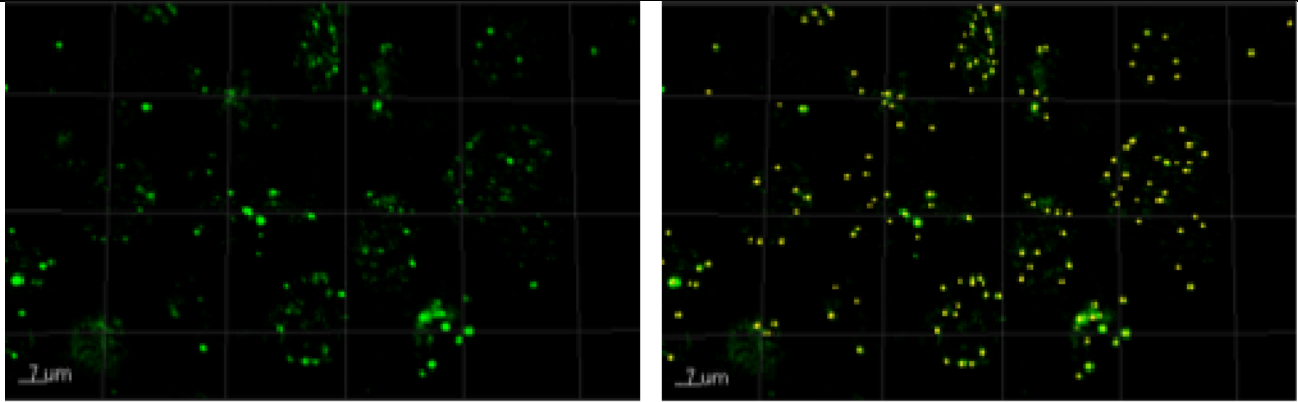

**Supplementary Figure 23**

Examples of image processing by Imaris to identify double-stranded breaks.

Left image is  $\gamma$ H2AX (green) immunofluorescence of control H9 hESCs. Right is a processed image by using the Imaris 8.4 to threshold IF signals and identify double-stranded breaks (yellow-pseudocolored).
