# Supplementary material
Source: PubMed Central journal article supplement (PMC6511450)
Supplement: NIHMS1021769-supplement-Supplemental_Tables_1-6.pdf [file NIHMS1021769-supplement-Supplemental_Tables_1-6.pdf]

**Supplementary Table 1. Antibodies used in this study.**

| <b>Antibody</b> | <b>Species</b> | <b>Source</b>             | <b>Catalogue Number</b> | <b>Dilution</b>                   | <b>Validation</b>                         |
|-----------------|----------------|---------------------------|-------------------------|-----------------------------------|-------------------------------------------|
| Anti-UTX        | Rabbit         | Cell Signaling Technology | 33510S                  | WB (1:1000)                       | PMID:<br>29227285                         |
| Anti-UTX        | Rabbit         | Millipore                 | ABE-409                 | IF (1:100); WB (1:1000); IP (6µl) | PMID:<br>29551674<br>Supplementary Fig2a; |
| Anti-UTX        | Rabbit         | Abcam                     | ab84190                 | IP/ChIP (6µl)                     | PMID:<br>28974674                         |
| Anti-RbBP5      | Rabbit         | Bethyl                    | A300-109A               | IF (1:200); WB (1:1000)           | PMID:<br>29263365                         |
| Anti-OCT4       | Rabbit         | Cell Signaling Technology | 2840S                   | IF (1:300)                        | PMID:<br>30338036                         |
| Anti-MAP2       | Chicken        | Abcam                     | ab5392                  | IF (1:10,000)                     | PMID:<br>29348617                         |
| Anti-TBR1       | Rabbit         | Abcam                     | ab31940                 | IF (1:200)                        | PMID:<br>29275859                         |
| Anti-OTX2       | Goat           | R&D Systems               | AF1979                  | IF (1:200)                        | PMID:<br>29988106                         |
| Anti-PTIP       | Rabbit         | Abcam                     | ab2614                  | WB (1:1000)                       | PMID:<br>25799990                         |
| Anti-YBX1       | Rabbit         | Abcam                     | ab12148                 | WB (1:1000)                       | PMID:<br>29866826                         |
| Anti-PAX6       | Rabbit         | Biologends                | 901301                  | IF (1:200)                        | PMID:<br>26879757                         |
| Anti-53BP1      | Mouse          | Millipore                 | 05-725                  | WB (1:1000)                       | PMID:<br>12640136                         |
| Anti-53BP1      | Rabbit         | Novus                     | NB100-304               | WB (1:1000); IP/ChIP (6µl)        | PMID:<br>30046110                         |

|                  |        |                           |             |                                        |                      |
|------------------|--------|---------------------------|-------------|----------------------------------------|----------------------|
|                  |        |                           |             |                                        | Supplementary Fig2b; |
| Anti-53BP1       | Rabbit | Abcam                     | ab36823     | IF (1:200); WB (1:1000); IP/ChIP (6µl) | PMID: 29343827       |
| Anti-γH2AX       | Mouse  | Millipore                 | 05-636      | IF (1:200)                             | PMID: 29403037       |
| Anti-flag        | Mouse  | Sigma Aldrich             | F1804-1MG   | WB (1:1000)                            | PMID: 24603765       |
| Anti-GST (680nm) | Goat   | Rockland                  | 600-144-200 | WB (1:5000)                            | PMID: 25384973       |
| Anti-6xHis       | Rabbit | Abcam                     | ab9108      | WB (1:1000)                            | PMID: 29849063       |
| Anti-cmyc        | Rabbit | Sigma Aldrich             | C3956-.2MG  | WB (1:1000)                            | PMID: 20453196       |
| Anti-pS10 H3     | Rabbit | Cell Signaling Technology | 3465S       | FACS (1:1000)                          | PMID: 26144554       |
| APC Anti-BrdU    | Mouse  | Biolegend                 | 339808      | FACS (1:500)                           | PMID: 27671632       |
| FITC Annexin V   | N.A    | Biolegend                 | 640905      | Followed manufacturer protocol         | PMID: 23785121       |
| Propidium Iodide | N.A    | Biolegend                 | 421301      | Followed manufacturer protocol         | PMID: 28150746       |
| Anti-beta actin  | Mouse  | Sigma Aldrich             | A1978       | WB (1:1000)                            | PMID: 17296734       |
| Anti-GAPDH       | Mouse  | Millipore                 | MAB374      | WB (1:1000)                            | PMID: 26381214       |
| Anti-βTubulin    | Mouse  | Sigma Aldrich             | T8660       | WB (1:1000)                            | PMID: 20074521       |

|                              |        |                                |            |            |                   |
|------------------------------|--------|--------------------------------|------------|------------|-------------------|
| Anti-TBR2                    | Rabbit | Invitrogen                     | 50-4877-42 | IF (1:40)  | PMID:<br>28768916 |
| Anti-Nestin                  | Mouse  | Santa Cruz<br>Biotechnology    | sc-23927   | IF (1:200) | PMID:<br>28946814 |
| Anti-<br>Vimentin            | Mouse  | Abcam                          | ab22651    | IF (1:200) | PMID:<br>30143638 |
| Anti-CTIP2                   | Rat    | Abcam                          | ab18465    | IF (1:300) | PMID:<br>29275859 |
| Anti-ZO-1                    | Mouse  | Thermo<br>Fisher<br>Scientific | 33-9100    | IF (1:300) | PMID:<br>29021339 |
| Anti-<br>CNPase              | Mouse  | Abcam                          | ab6319     | IF (1:200) | PMID:<br>29400711 |
| Anti-<br>Histone<br>H3K27Ac  | Rabbit | Active Motif                   | 39133      | ChIP (4µl) | PMID:<br>30464211 |
| Anti-<br>Histone<br>H3K27me3 | Rabbit | Active Motif                   | 39155      | ChIP (4µl) | PMID:<br>30305620 |
| Anti-<br>Histone<br>H3K79me2 | Rabbit | Active Motif                   | 39144      | ChIP (4µl) | PMID:<br>30270107 |

**Supplementary Table 2. Expression vectors.**

| <b>Vector Name</b> | <b>Source</b>                       | <b>Catalogue Number</b> | <b>Protein Tag</b> | <b>Expression</b> | <b>Bacterial Resistance Gene</b> |
|--------------------|-------------------------------------|-------------------------|--------------------|-------------------|----------------------------------|
| lentiCRISPR v2     | Addgene                             | 52961                   | N.A                | Mammalian         | <i>Puro</i>                      |
| pDONR221           | Thermo Fisher Scientific            | 12536017                | N.A                | N.A               | <i>Kan</i>                       |
| pDEST15            | Thermo Fisher Scientific            | 11802014                | GST                | <i>E. coli</i>    | <i>Amp</i>                       |
| pDEST17            | Thermo Fisher Scientific            | 11803012                | His                | <i>E. coli</i>    | <i>Amp</i>                       |
| pGEX-6P-1*         | Amersham                            | 27-4597-01              | GST                | <i>E. coli</i>    | <i>Amp</i>                       |
| pAMW               | Drosophila Genomics Resource Center | 1103                    | Myc                | <i>Drosophila</i> | <i>Amp</i>                       |
| pAFW               | Drosophila Genomics Resource Center | 1111                    | Flag               | <i>Drosophila</i> | <i>Amp</i>                       |

**Supplementary Table 3. Primers for expression constructs**

| <b>Construct Primers</b>      | <b>Oligo Sequences</b>                                                                   |
|-------------------------------|------------------------------------------------------------------------------------------|
| h53BP1 GW dom1F               | AAAAAGCAGGCTTCGACCCTACTGGAAGTCAG                                                         |
| h53BP1 GW dom1R               | AGAAAGCTGGGTGTTACTGGTCAAACAAGTCTTCC                                                      |
| h53BP1 GW dom2F               | AAAAAGCAGGCTTCGAGGTTTTGTCAACTCAGG                                                        |
| h53BP1 GW dom2R               | AGAAAGCTGGGTGTTAGCAACCAGTGGCTAAAAT                                                       |
| h53BP1 GW dom3F               | AAAAAGCAGGCTTCGATGATACAGACACCAGGG                                                        |
| h53BP1 and m53BP1<br>GW dom3R | AGAAAGCTGGGTGTTAAGGCAAAGTCAAATGAAATGG                                                    |
| m53BP1 GW dom3F               | AAAAAGCAGGCTTCGAGGATGAAACGGAGGACAG                                                       |
| m53BP1 GW dom3iii F           | AAAAAGCAGGCTTCCAAGTACTTGACCAGGAATTAGA                                                    |
| h53BP1 GW dom4F               | AAAAAGCAGGCTTCTGTGAAAGTTCTAGTGAAACC                                                      |
| h53BP1 GW dom4R               | AGAAAGCTGGGTGTTACTGGCTATGGAGCGACTC                                                       |
| h53BP1 GW dom5F               | AAAAAGCAGGCTTCCAGGGAGAAGAAGAGTTTG                                                        |
| h53BP1 GW dom5R               | AGAAAGCTGGGTGTTACAACACATCACATTCGTACC                                                     |
| h53BP1 GW dom6F               | AAAAAGCAGGCTTCCGTGTTGTAGCCAAGTGG                                                         |
| h53BP1 GW dom6R               | AGAAAGCTGGGTGTTATGTATACTGCTTGTTGAAAGG                                                    |
| h53BP1 GW dom7F               | AAAAAGCAGGCTTCGGAGACAACACCGGTGAA                                                         |
| h53BP1 GW dom7R               | AGAAAGCTGGGTGTTATTAGTGAGAAACATAATCGTGTTT<br>AT                                           |
| attB1-flag-53BP1d3-F          | GGGGACAAGTTTGTACAAAAAAGCAGGCTTCGACTACAA<br>AGACCATGACGGTGATGATACAGACACCAGGG              |
| attB2-53BP1-nt642-R           | GGGGACCACTTTGTACAAGAAAGCTGGGTTTTATAATCTA<br>TTCTCAGCACATGGT                              |
| attB1-flag-53bp1-<br>nt322-F  | GGGGACAAGTTTGTACAAAAAAGCAGGCTTCGACTACAA<br>AGACCATGACGGTACTCAGTCCCAAGGGTTG               |
| attB2-53bp1-nt963-R           | GGGGACCACTTTGTACAAGAAAGCTGGGTTTTAAGGCAA<br>AGTGAAATGAAATGG                               |
| attB1-myc-53bp1-<br>nt643-F   | GGGGACAAGTTTGTACAAAAAAGCAGGCTTCGAGCAGAA<br>GTTGATTTCCGAGGAGGATCTGGACACCAAGGAAGAAAA<br>GA |

|                       |                               |
|-----------------------|-------------------------------|
| Gateway Adapter attB1 | GGGGACAAGTTTGTACAAAAAAGCAGGCT |
| Gateway Adapter attB2 | GGGGACCACTTTGTACAAGAAAGCTGGGT |

**Supplementary Table 4. Primers for ChIP-qPCR.** h and m denotes human and mouse, respectively.

| <b>ChIP qPCR Primers</b> | <b>Oligo Sequences<br/>5'-Forward Primer-3'<br/>5'-Reverse Primer-3'</b> |
|--------------------------|--------------------------------------------------------------------------|
| hCHD5_ChIP               | TTTAAATGAGCGCCTCCAGT<br>CCTGGAACTTTTGCGTTCTT                             |
| hDLL1_ChIP               | GCATGGCTAATGAGATGCAA<br>GGAAAAGTGGCTCCTTTGTG                             |
| hZIC1_ChIP               | CGAGCGTGAGAGAAAGGAGA<br>ATAGAGGAATGTGAGCGCCA                             |
| hDLX2_ChIP               | CCACTCGGCACTTGACATAA<br>CTGCGGATTGGTTAAGAAGC                             |
| hFGF9_ChIP               | GCCACCAACGTGAGATTTTT<br>AGGCATGCGCTGTTTTTACT                             |
| hGRIK2_ChIP              | GAACATGCAGCGATTGCTAA<br>TGGGTTCCGGTAGAAATGAG                             |
| hPAX5_ChIP               | CTCCCCACATCAAGTTCCAT<br>CCCGGATTCATCTCCAGTA                              |
| hSIX3_ChIP               | TGTTGTCATTAGGGCGATTG<br>AGAGGAGAGGGAGAGCCAAC                             |
| hSOX11_ChIP              | CTAGCTGGGGGAGTGATGTC<br>CGCTCCTTCTGCAAAAAGTT                             |
| hFOXG1_ChIP              | AAGCTGGGACTGTGAGATCC<br>GCTTTTATTTTGTGCGGGCC                             |
| hIntergenic-1_ChIP       | GCACTTTGACATGCTGAGGA<br>CTTCCTGTGCTTTGGGAGAG                             |
| mChd5_ChIP               | CACTGAGCTGCCCAAGACTA<br>TTGTGACGTCCAGTCTGGTT                             |
| mDII1_ChIP               | CCGCTCCCAGAGTGTTCTA<br>ATGGCATTGGCTGAATTCTT                              |
| mZic1_ChIP               | TGATGAATGGGAGCAGGGG<br>TACCTGGGATTGATGAGGCG                              |
| mDlx2_ChIP               | GCGCCTCCTCTGTCTATCTC<br>GCCTAGACCGTAGCCTCATTT                            |

|                    |                                               |
|--------------------|-----------------------------------------------|
| mFgf9_ChIP         | CTGGGAGGAGAGATTTGTCTG<br>AGGCATGCGCTGTTTTACT  |
| mGrik2_ChIP        | CTGCATTTCCCATTCAGGTT<br>GATTTCCCTGCCAGCTTCTTG |
| mPAX5_ChIP         | CTCGCCATGTGAGATCATGT<br>ACACCCTTTCCCTGGTTCTT  |
| mSix3_ChIP         | TCCGGCTAAGTGGTAAAACC<br>CTATTGGTCTGTGGCGTGTC  |
| mSox11_ChIP        | CTCACTCGCTTGATTTCTCG<br>GAGAGCCCTCAACTTTTTGC  |
| mFoxg1_ChIP        | GGAAGTAGACGCCCACTCAT<br>TCCACCTCCTCTTCAGCTTC  |
| mIntergenic-2_ChIP | TCATGTCCTCAGACTCAGCC<br>ACTTGTCTCAAGCGAAGGA   |
| GATA4_ChIP         | ACAGTTCCTCCCACGCATAT<br>TGATACATGGTCCCTGCGAG  |
| H2AXp_ChIP         | CGACATGCTAGCGAGGTAGA<br>GTCCTGGGGGCTTATAAAGG  |
| H2AXP_ChIP         | CGACATGCTAGCGAGGTAGA<br>GTCCTGGGGGCTTATAAAGG  |
| PTIPp_ChIP         | GCCCCAAGGATGTGTTAGAA<br>TGGCTTGCTTCCTTGACTG   |
| PRL27Ap_ChIP       | TTTGGTGAGGAGCTCAGACA<br>GAGGGCGAGAACTGTTGAAG  |
| RPS6p_ChIP         | AAAGGCGAGCCTTCTCCTAC<br>TGGTGGCGAGTGTTAGACTG  |



**Supplementary Table 5. gRNA sequences**

| <b>gRNA Name<br/>(Targeting Strand)</b> | <b>Oligo Sequences<br/>5'-Forward Primer-3'<br/>5'-Reverse Primer-3'</b> |
|-----------------------------------------|--------------------------------------------------------------------------|
| TP53BP1-Ex3-A                           | AACGAGGAGACGGTAATAGT                                                     |
| TP53BP1-Ex4-C                           | CACATGTGGTTCCATCAGTC                                                     |
| TP53BP1-Ex2-A                           | GCCTGAAAGCCAGGTTCTAG                                                     |
| TP53BP1-Ex2-C                           | CAGGATTTTCTTTGTGCGTC                                                     |
| TP53BP1-Ex12-1                          | TGTGAAGAATCTTGCTCTAC                                                     |
| TP53BP1-Ex12-2                          | GCAGCTAAGCTCAGATGCAG                                                     |
| UTX-ex1-1                               | GGTAGCGAGCGACACTCCGC                                                     |
| UTX-ex1-2                               | CTCTCCTCGGCTGTCAGGCT                                                     |
| UTX-ex4                                 | CAGCATTATCTGCATACCAG                                                     |
| UTX-ex6                                 | TATGAGTCTAGTTTAAAGGT                                                     |
| mouse 53bp1-ex12-1                      | CGAACCTGTCAGACCCGA                                                       |
| mouse 53bp1-ex12-2                      | GGGCGCATGCCAGCAGCT                                                       |

**Supplementary Table 6. Primers for RT-qPCR.** h and m denotes human and mouse, respectively.

| <b>qPCR Primers</b> | <b>Oligo Sequences</b><br><b>5'-Forward Primer-3'</b><br><b>5'-Reverse Primer-3'</b> |
|---------------------|--------------------------------------------------------------------------------------|
| hOCT4_cDNA          | GACAACAATGAGAACCTTCAGGAGA<br>CTGGCGCCGGTTACAGAACCA                                   |
| hNANOG_cDNA         | GCAATGGTGTGACGCAGAAGG<br>AGGTTCCCAGTCGGGTTCA                                         |
| hPAX6_cDNA          | TGGGCAGGTATTACGAGACTG<br>ACTCCCGCTTATACTGGGCTA                                       |
| hGSC_cDNA           | AGGAGAAAGTGGAGGTCTGGT<br>CGACGACGTCTTGTTCCACT                                        |
| hT_cDNA             | AGAACGGCAGGAGGATGTTT<br>GAAGGAGTACATGGCGTTGG                                         |
| hSOX1_cDNA          | CAACCAGGACCGGGTCAAAC<br>TCGGACATGACCTTCCACTCG                                        |
| hSOX2_cDNA          | TACAGCATGTCCTACTCGCAG<br>GAGGAAGAGGTAACCACAGGG                                       |
| hDLL_cDNA           | CTGATGACCTCGCAACAGAA<br>ACACACGAAGCGGTAGGAGT                                         |
| hADGRG1_cDNA        | GAAACCTCGGGACTACACCA<br>AAGTGCAGGAAGATGGCACT                                         |
| hCHD5_cDNA          | TGGTGACGGCTATGAGACAG<br>GTCCAGGCATACGAGATGGT                                         |
| hCDK5R1_cDNA        | ATGCCGACCCACACTACTTC<br>CTACAGTGCTCACCGATCCA                                         |
| hNR4A3_cDNA         | CRACTACACCAAGCTGACCA<br>ATTTGGTACACGCAGGAAGG                                         |
| hDLX2_cDNA          | GCAGCTATGACCTGGGCTAC<br>TCCTTCTCAGGCTCGTTGTT                                         |
| hHES5_cDNA          | GTGGGTGCCTCCACTATGAT<br>GGCTTCCACGTGACTGAGA                                          |
| hSIX3_cDNA          | GCCATCAACAAACACGAGTC<br>TGTGGTTCTCAAGGATGTGG                                         |

|                |                                                      |
|----------------|------------------------------------------------------|
| hPAX5_cDNA     | CGTCAGTTCCATCAACAGGA<br>ACGGAGCCAGTGGACACTAT         |
| hASCL1_cDNA    | CATCTCCCCCAACTACTCCA<br>CCAGTTGGTGAAGTCGAGAA         |
| hDCX_cDNA      | ACCGCTACTTCAAGGGGATT<br>TGAGGCAGGTTGATGTTGTC         |
| hDLX5_cDNA     | TCTCAGGAATCGCCAACTTT<br>AGGAAGCCGAGGTAGGAGAG         |
| hDLX6_cDNA     | AGGGGACGACACAGATCAAC<br>CGATGGTTTAAAGCCTGGAG         |
| hGRIK2_cDNA    | AGGCCTCACAGGCAGAATAA<br>TCCCACGTTCCAATCTTTTC         |
| hNEUR1_cDNA    | AGATCCTCATGGACCTCAGC<br>TTCAGCCTGACTTGCTCGTA         |
| hPAX3_cDNA     | CAAGGGGCATCAGGTACTGT<br>TTCCTTCTTGGGTTGCTGTT         |
| hWNT7A_cDNA    | CCAACTACTGCGAGGAGGAC<br>ACAGCACATGAGGTCACAGC         |
| mNestin_cDNA   | GTCTCAGGACAGTGCTGAGCCTTC<br>TCCCCTGAGGACCAGGAGTCTC   |
| mMusashi1_cDNA | GATGGCTCCCCCTCCAGGTT<br>CATTGGTGAAGGCTGTGGCA         |
| mPax6_cDNA     | TCTTTGCTTGGGAAATCCG<br>CTGCCCGTTCAACATCCTTAG         |
| mSox1_cDNA     | GTTTTTTGTAGTTGTTACCGC<br>GCATTTACAAGAAATAATAC        |
| mDcx_cDNA      | CCTCTTTCTTCTTTTTATTTGCCTTA<br>GGAACCACAGCAACTTTTCCAA |
| mGfap_cDNA     | CAATGCTGGCTTCAAGGAGACACG<br>TCAGTTCAGCTGCCAGCGCCT    |
| mTubb3_cDNA    | TCTGGCGCCTTTGGACACCTATT<br>TTCTCACACTCTTTCCGCACGACA  |
| mMap2_cDNA     | TGTGCTGTGTGCTCCAAGTT<br>GCTGGTGGTATGTTCTGGCT         |

|               |                                                      |
|---------------|------------------------------------------------------|
| mOlig1_cDNA   | CTCGCCCAGGTGTTTTGTTG<br>TATAAGCCTGCGCTACGACG         |
| mSox2_cDNA    | ACAGCATGTCCTACTCGCAG<br>ATGCTGATCATGTCCCGGAG         |
| mEno2_cDNA    | CTCCCGCTGATCCTTCCCGATACA<br>ATGCCGACGTTGGCTGTGAACTTG |
| mOlig2_cDNA   | TGGAGAGATGCGTTCGTTCC<br>GTGCTCTGCGTCTCGTCTAA         |
| mDII1_cDNA    | CAGGGATACACACAGCAAACG<br>GCAGACAGAACATACACCGAC       |
| mAdgrg1_cDNA  | TGTTTTCTCTGGTGCAAGGTG<br>AGAAGCGGGGAATATCTGGG        |
| mChd5_cDNA    | GCACAAGGTCCTAAACCAGC<br>TGTACATCTGAGAGGAGCCG         |
| mCdk5R1_cDNA  | AGAACGCCAAGGACAAGAACC<br>CACAGGACAGCGACTTCTTCA       |
| mNr4a3_cDNA   | CATGAACCCCGACTACACCAA<br>GCGACCCTCTTCCATCTTGAT       |
| mDlx2_cDNA    | AAACCACGCACCATCTACTCC<br>TCGCCGCTTTTCCACATCTT        |
| mHes5_cDNA    | GAGAAAAACCGACTGCGGAA<br>CGAAGGCTTTGCTGTGTTTC         |
| mSix3_cDNA    | CGCTTGCTCTCTCTAACTCG<br>GTAACCCCTACCCTCATGC          |
| mCdc7_cDNA    | AGGAAAAGACGGAAAGGAGAGA<br>GATTGCTTGATGAGTTTCTCTGC    |
| mFam111a_cDNA | CACAGGACCAAGCATCTACCA<br>ACAAAACCTGCCATCCTTCCT       |
| mFen1_cDNA    | ATTCCTCTTCGCCGCCATT<br>GTCATTCTCACGGATGGCAC          |
| mMcm5_cDNA    | TAGGAGGGCTGAGGTACAGT<br>TACTTGAAGGTGAAGCCCGT         |
| mNasp_cDNA    | GATGAGGAAGCAAGGGAAGAGT<br>TCCACCCTTCTCCACTTCACT      |

|             |                                                |
|-------------|------------------------------------------------|
| mKdm6a_cDNA | CACTCAGGGGCTTCACAAAG<br>ACTGAATTGCTAGGCAGGGT   |
| mYars_cDNA  | TATCCGTGTGGGCAAATCCT<br>GCCTCTCATCTTCTGGGGTTT  |
| mCars_cDNA  | CTGAGCATTAGTGACGAGGCA<br>CGCTTCTATGTGCCTGAACCA |
| mNars_cDNA  | CAATCCTGCTGTGTCGCTTTC<br>AGTAGTAAGGAGCGGGGTCAA |
| mLars_cDNA  | AAAACGGACCGAGGGATCAA<br>GGTGAGGTGGACTTTCTTGCT  |
